# Supplementary material for: Edisto Inlet as a sentinel for the Late Holocene environmental changes over the Ross Sea: insights from foraminifera turnover events
Source: Copernicus journal article supplement (doi:10.5194/egusphere-2025-309), 2025-02-07
Supplement: Supplementary file 1 [file egusphere-2025-309-supplement.zip]

## Sheet: Raw_count_Foraminifera
Age (yrs BP)	Astrononion echolsi	Ammodiscus sp,	Astrononion antarticum	Cassidulinoides porrectus	Cibicides lobatulus	Cibicides refulgens	Epistominella exigua	Elphidium sp.	Fissurina semimarginata	Fissurina sp.	Globocassidulina biora	Globocassidulina crassa	Globocassidulina sp.	Globocassidulina subglobosa	Heronallenia Kempii	Hyalinonetrion sahulense	Lagena sp.	Melonis barleanum	Nonionella bradii	Nonionella iridea	Nonionella magnalingua	Nonionella sp.	Oolina exagona	Procerolagena multilatera	Patellina corrugata	Pullenia quinqueloba	Rosalina globularis	Rosalina villardeboana	Stainforthia feylingi	Stainforthia sp.	Trifarina angulosa	Miliammina oblonga	Pyrgo depressa	Pyrgo williamsoni	Quinqueloculina seminula	Quinqueloculina sp.	Quinqueloculina venusta	Quinqueloculina Weaveri	Labrospira jeffreysii	Lagenammina diffusiformis	Miliammina arenacea	Paratrochammina bartrami	Paratrochammina tricamerata	Portatrochammina antarctica	Portatrochammina bipolaris	Paratrochammina Nana	Pseudotrochammina arenacea	Rhumblerella sp.	Textularia earlandii
-66	0	0	0	0	0	0	0	0	0	0	0	0	0	0	0	0	0	0	0	0	0	0	0	0	0	0	0	0	0	0	0	0	0	0	0	0	0	0	0	0	0	0	0	0	0	0	0	0	0
-26	0	0	0	0	0	0	0	0	0	0	1	0	0	0	0	0	0	0	0	0	0	0	0	0	0	0	0	0	0	0	0	0	0	0	0	0	0	0	0	0	0	1	0	1	0	0	0	0	0
50	0	0	0	0	0	0	0	0	0	0	26	0	0	1	0	0	0	0	0	0	0	0	0	0	0	0	0	0	0	0	1	0	0	0	0	0	0	0	2	0	0	3	0	7	0	0	0	0	0
145	0	0	0	0	0	0	0	0	0	0	8	0	0	1	0	0	0	0	0	0	0	0	0	0	0	0	0	0	0	0	0	0	0	0	0	0	0	0	0	0	0	3	0	1	0	0	0	0	0
258	0	0	0	0	0	0	0	0	0	0	0	0	0	1	0	0	0	0	0	0	0	0	0	0	0	0	0	0	0	0	0	0	0	0	0	0	0	0	0	0	1	1	0	2	0	0	0	0	0
372	0	0	0	0	0	0	0	0	0	0	1	0	0	0	0	0	0	0	0	0	0	0	0	0	0	0	0	0	0	0	0	0	0	0	0	0	0	0	0	0	0	2	0	0	0	0	0	0	0
478	0	0	0	0	0	0	0	0	0	0	12	0	0	2	0	0	0	0	0	0	0	0	0	0	0	0	0	0	0	0	4	0	0	0	0	0	0	0	3	0	2	2	0	2	0	0	0	0	0
580	1	0	0	0	0	0	0	0	0	0	12	0	0	1	0	0	0	0	0	0	0	0	0	0	0	0	0	0	0	0	2	1	0	0	0	0	0	0	4	0	1	4	0	5	0	0	0	0	0
679	0	0	0	0	0	0	0	0	0	0	31	0	0	2	0	0	0	0	0	0	0	0	0	0	0	0	0	0	0	0	1	0	0	0	0	0	0	0	4	0	0	5	0	6	0	0	0	0	0
691	1	0	0	0	0	0	0	0	0	0	19	0	5	0	0	0	0	0	0	0	0	0	0	0	0	0	0	0	0	0	1	0	0	0	0	0	0	0	0	0	1	2	0	2	0	0	0	0	0
696	0	0	0	0	0	0	0	0	0	0	0	0	0	0	0	0	0	0	0	0	0	0	0	0	0	0	0	0	0	0	0	0	0	0	0	1	0	0	0	0	1	9	0	5	0	0	0	0	0
708	0	0	0	0	0	0	0	0	0	0	14	0	0	2	0	0	0	0	0	0	0	0	0	0	0	0	0	0	0	0	0	0	0	0	0	0	0	0	0	0	1	3	0	2	0	0	0	0	0
727	0	0	0	0	0	0	0	0	0	0	0	0	0	0	0	0	0	0	0	0	0	0	0	0	0	0	0	0	0	0	0	0	0	0	0	0	0	0	0	0	0	1	0	0	0	0	0	0	0
748	0	0	0	0	0	0	0	0	0	0	0	0	0	0	0	0	0	0	0	0	0	0	0	0	0	0	0	0	0	0	0	0	0	0	0	0	0	0	1	0	0	3	1	3	0	2	0	0	0
770	0	0	0	0	0	0	0	0	0	0	0	0	0	0	0	0	0	0	0	0	0	0	0	0	0	0	0	0	0	0	0	0	0	0	0	0	0	0	0	0	0	6	0	4	0	3	0	0	0
793	0	0	0	0	0	0	0	0	0	0	0	0	0	0	0	0	0	0	0	0	0	0	0	0	0	0	0	0	0	0	0	0	0	0	0	0	0	0	0	0	0	3	0	1	0	0	0	0	0
816	0	0	0	0	0	0	0	0	0	0	0	0	0	0	0	0	0	0	0	0	0	0	0	0	0	0	0	0	0	0	0	0	0	0	0	0	0	0	0	0	0	2	0	3	0	0	0	0	0
838	0	0	0	0	0	0	0	0	0	0	0	0	0	0	0	0	0	0	0	0	0	0	0	0	0	0	0	0	0	0	0	0	0	0	0	0	0	0	0	0	0	3	0	0	0	0	0	0	0
861	0	0	0	0	0	0	0	0	0	0	0	0	0	0	0	0	0	0	0	0	0	0	0	0	0	0	0	0	0	0	0	0	0	0	0	0	0	0	2	0	0	2	0	8	0	2	0	0	0
881	0	0	0	0	0	0	0	0	0	0	0	0	0	0	0	0	0	0	0	0	0	0	0	0	0	0	0	0	0	0	0	0	0	0	0	0	0	0	0	0	0	0	0	0	0	0	0	0	0
890	0	0	0	0	0	0	0	0	0	0	0	0	0	0	0	0	0	0	0	0	0	0	0	0	0	0	0	0	0	0	0	0	0	0	0	0	0	0	1	0	1	2	0	5	0	0	0	0	0
910	0	0	0	0	0	0	0	0	0	0	1	0	0	0	0	0	0	0	0	0	0	0	0	0	0	0	0	0	0	0	0	0	0	0	0	0	0	0	2	0	1	7	0	8	0	0	0	0	0
931	0	0	0	0	0	0	0	0	0	0	0	0	0	0	0	0	0	0	0	0	0	0	0	0	0	0	0	0	0	0	0	0	0	0	0	0	0	0	5	0	1	10	0	5	0	0	0	1	0
953	0	0	0	0	0	0	0	0	0	0	0	0	0	0	0	0	0	0	0	0	0	0	0	0	0	0	0	0	0	0	0	0	0	0	0	0	0	0	2	0	0	3	0	3	0	0	0	0	0
974	0	0	0	0	0	0	0	0	0	0	1	0	0	0	0	0	0	0	0	0	0	0	0	0	0	0	0	0	0	0	0	0	0	0	0	0	0	0	2	0	0	0	0	0	0	0	0	0	0
995	0	0	0	0	0	0	0	0	0	0	14	0	0	0	0	0	0	0	0	0	0	0	0	0	0	0	0	0	1	0	0	0	0	0	0	0	0	0	5	0	0	4	0	7	0	1	0	0	0
1016	0	0	0	0	0	0	0	0	0	0	6	0	0	0	0	0	0	0	0	0	0	0	0	0	0	0	0	0	0	0	0	0	0	0	0	0	0	0	3	0	0	18	2	25	0	0	0	1	0
1037	0	0	0	0	0	0	0	0	0	0	11	0	0	0	0	0	0	0	0	0	0	0	0	0	0	0	0	0	3	0	2	0	0	0	0	0	0	0	4	0	0	4	0	1	0	0	2	0	0
1057	0	0	0	0	0	0	0	0	0	0	76	0	0	1	0	0	0	0	0	0	0	0	0	0	0	0	0	0	2	0	0	0	0	0	0	0	0	0	2	0	0	1	0	0	0	0	0	0	0
1076	0	0	0	0	0	0	0	0	0	0	10	0	0	1	0	0	0	0	0	0	0	0	0	0	0	0	0	0	0	0	0	0	0	0	0	0	0	0	2	0	0	5	0	3	2	0	0	0	0
1091	0	0	0	0	0	0	0	0	0	0	0	0	0	0	0	0	0	0	0	0	0	0	0	0	0	0	0	0	0	0	0	0	0	0	0	0	0	0	3	0	1	3	1	5	0	0	0	0	0
1109	0	0	0	0	0	0	0	0	0	0	0	0	0	0	0	0	0	0	0	0	0	0	0	0	0	0	0	0	0	0	0	0	0	0	0	0	0	0	3	0	1	7	0	4	0	1	0	0	0
1129	0	0	0	0	0	0	0	0	0	0	0	0	0	0	0	0	0	0	0	0	0	0	0	0	0	0	0	0	0	0	0	0	0	0	0	0	0	0	3	0	1	4	0	6	0	0	0	0	0
1148	0	0	0	0	0	0	0	0	0	0	0	0	0	0	0	0	0	0	0	0	0	0	0	0	0	0	0	0	0	0	0	0	0	0	0	0	0	0	3	0	0	2	0	1	0	2	0	0	0
1167	0	0	0	0	0	0	0	0	0	0	2	0	0	0	0	0	0	0	0	0	0	0	0	0	0	0	0	0	0	0	0	0	0	0	0	0	0	0	4	0	0	1	0	6	0	0	0	0	0
1186	0	0	0	0	0	0	0	0	0	0	48	0	15	2	0	0	0	0	0	0	0	0	0	0	0	0	0	0	1	0	0	0	0	0	1	0	0	0	2	0	0	0	0	1	0	0	0	0	0
1205	0	0	0	0	0	0	0	0	1	0	62	0	0	3	0	0	0	0	0	0	0	0	0	0	0	0	0	1	2	0	0	0	0	0	0	0	0	0	1	0	1	8	0	5	0	0	0	0	0
1225	0	0	0	0	0	0	1	0	0	0	24	0	0	0	0	0	0	0	0	0	0	0	0	0	0	0	0	0	2	0	0	0	0	0	0	0	0	0	9	0	0	1	0	3	0	0	0	0	0
1245	0	0	0	0	0	0	0	0	0	0	8	0	0	1	0	0	0	0	0	1	0	0	0	0	0	0	0	0	0	0	0	0	0	0	0	0	0	0	1	0	0	3	0	3	0	0	0	0	0
1264	0	0	1	0	0	0	0	0	0	0	57	0	0	0	0	0	0	0	0	0	0	0	0	0	0	0	0	0	1	0	0	0	0	0	0	0	0	0	1	0	0	0	0	2	0	0	0	0	0
1279	0	0	0	0	0	0	0	0	0	0	20	0	0	2	0	0	0	0	0	0	0	0	0	0	0	0	0	0	1	0	0	0	0	0	0	0	0	0	3	0	0	6	0	6	0	0	0	0	0
1297	0	0	0	0	0	0	0	0	0	0	0	0	0	0	0	0	0	0	0	0	0	0	0	0	0	0	0	0	0	0	0	0	0	0	0	0	0	0	2	0	1	4	0	12	0	0	0	0	0
1317	0	0	1	0	0	0	0	0	0	0	6	0	0	0	0	0	0	0	0	0	0	0	0	0	0	0	0	0	0	0	1	0	0	0	0	0	0	1	3	0	1	6	0	4	0	0	0	0	0
1336	0	0	0	0	0	0	0	0	0	0	49	0	0	14	0	0	0	0	0	0	0	0	0	0	0	0	0	0	2	0	0	0	0	0	0	0	0	0	1	0	1	0	0	1	0	0	0	0	0
1356	0	0	0	0	0	0	0	0	0	0	40	0	0	3	0	0	0	0	0	0	0	0	0	0	0	0	0	0	0	0	0	0	0	0	0	0	0	0	0	0	1	5	0	1	0	1	0	0	0
1375	0	0	0	0	0	0	0	0	0	0	4	0	0	1	0	0	0	0	0	0	0	0	0	0	0	0	1	0	0	0	1	0	0	0	0	0	0	0	2	0	0	4	0	4	0	0	0	0	0
1394	0	0	2	0	0	0	0	0	0	0	155	0	0	3	0	0	0	0	0	0	0	0	0	0	0	0	0	0	8	0	0	0	0	0	0	0	0	0	4	0	3	7	1	2	0	0	0	0	0
1414	0	0	0	2	0	0	0	0	0	0	22	0	0	9	0	0	0	0	3	1	0	0	0	0	0	0	0	0	0	0	1	0	0	0	0	0	0	0	0	0	1	6	1	1	0	2	0	0	0
1432	0	0	1	0	0	0	0	0	0	0	38	1	0	4	0	0	0	0	0	0	0	0	0	0	0	0	0	0	0	0	1	0	0	0	0	0	0	0	6	0	0	9	0	5	0	0	0	0	0
1452	0	0	0	0	0	0	0	0	0	0	66	0	0	1	0	0	0	1	0	0	0	0	0	2	0	0	0	0	5	0	0	0	0	0	0	0	0	0	1	0	9	4	0	13	0	0	0	0	0
1470	0	0	0	0	0	0	0	0	0	0	57	0	0	2	0	0	0	0	0	0	0	0	0	0	0	0	0	0	0	0	0	0	0	0	0	0	0	0	1	0	2	3	0	8	0	1	0	0	0
1486	0	0	0	0	0	0	0	0	0	0	105	0	0	0	0	0	0	0	0	0	0	0	0	0	0	0	0	0	3	0	0	0	0	0	0	0	0	0	5	0	1	0	0	1	0	1	0	0	0
1507	0	0	1	0	0	1	1	0	0	0	26	0	0	9	0	0	0	0	1	0	0	0	0	0	0	0	2	0	0	0	2	0	0	0	0	0	0	0	1	0	0	0	0	0	0	0	0	0	0
1533	0	0	0	0	0	0	0	0	0	0	28	0	0	27	0	0	0	0	0	1	0	0	0	0	0	0	1	0	1	0	0	0	0	0	0	0	1	0	3	0	0	0	0	2	0	1	0	0	0
1559	0	0	0	0	0	1	1	0	0	0	50	2	0	29	0	0	0	0	0	1	0	0	0	0	0	0	0	0	0	0	0	0	0	0	0	0	0	0	1	0	0	3	0	2	0	0	0	0	0
1585	0	0	0	0	0	0	0	0	0	0	61	3	0	15	0	0	0	0	0	1	0	1	0	0	0	0	0	0	1	0	2	0	1	0	0	0	0	0	2	0	0	1	0	6	0	0	0	0	0
1610	0	0	0	0	0	1	0	0	0	1	43	0	0	17	0	0	0	0	0	1	0	0	1	0	0	0	0	0	0	0	0	0	0	0	0	0	0	0	3	0	1	1	0	2	0	0	0	0	0
1663	0	0	0	0	0	1	0	0	0	0	18	0	1	11	0	0	0	0	0	0	0	0	0	0	0	0	0	0	0	0	0	0	0	1	0	0	0	0	0	0	0	0	0	1	0	1	0	0	0
1697	0	0	0	0	0	0	1	0	0	0	195	1	0	18	0	0	0	0	0	0	0	0	0	0	0	0	0	0	0	0	3	0	0	0	0	0	0	0	4	0	0	1	0	0	0	0	0	0	0
1721	0	0	0	0	0	0	0	0	0	0	10	0	0	23	0	0	0	0	0	3	0	0	0	0	0	0	0	0	0	0	1	0	1	0	0	0	0	0	1	0	0	0	0	3	0	0	0	0	0
1749	0	0	0	0	0	2	1	0	0	0	22	0	0	23	0	0	0	1	0	1	0	0	0	0	0	0	0	0	0	0	0	0	0	0	0	1	0	0	2	0	0	5	0	4	0	0	0	0	0
1772	0	0	0	0	0	0	0	0	0	0	32	0	0	10	0	0	0	0	0	0	0	0	0	0	0	0	0	0	2	0	0	0	0	0	0	0	0	0	3	0	1	2	0	1	0	0	0	0	0
1797	0	0	0	0	0	0	1	0	0	0	67	0	0	9	0	0	0	0	0	0	0	0	0	0	0	0	0	0	0	0	0	0	0	0	0	0	0	0	3	0	1	3	0	0	0	0	0	0	0
1824	0	0	0	0	1	1	0	0	0	0	26	0	0	16	0	0	0	0	1	0	0	0	0	0	0	0	0	0	1	0	0	0	0	0	0	0	0	0	1	0	0	1	0	0	0	2	0	0	0
1851	0	0	0	0	0	0	0	0	0	0	131	0	0	14	0	0	0	0	0	0	0	0	0	0	0	0	0	0	3	0	1	0	0	0	0	0	0	0	3	0	0	6	0	6	0	1	0	0	0
1878	0	0	1	2	0	3	6	0	0	1	256	17	0	45	0	0	0	0	2	3	1	1	0	0	0	2	1	0	0	0	10	0	0	0	0	1	0	0	2	0	0	4	0	9	0	0	0	0	0
1905	2	0	1	0	1	0	0	0	0	0	153	4	0	20	0	1	0	0	3	1	0	0	0	0	0	0	0	0	3	1	4	0	0	0	0	1	0	0	0	0	0	0	0	4	0	0	0	0	0
1932	0	0	0	0	0	0	0	0	0	0	15	0	0	3	1	0	0	0	0	0	0	0	0	0	0	0	1	0	2	0	0	0	0	0	0	0	0	0	0	0	1	6	0	4	0	0	0	0	0
1960	0	0	0	0	0	5	0	0	1	0	528	1	0	5	0	0	0	0	1	0	0	0	0	0	0	0	0	0	4	0	5	0	0	0	0	0	0	0	2	0	0	9	4	13	0	0	0	0	0
1987	0	0	2	0	0	1	7	0	1	0	243	0	0	20	0	1	0	0	6	6	3	0	0	0	0	1	0	0	11	0	6	0	0	0	0	0	0	0	4	0	3	5	0	10	0	0	0	0	0
2009	0	0	0	0	0	0	0	0	0	0	64	0	0	1	0	0	0	0	0	0	0	0	0	0	0	0	0	0	0	0	2	0	0	0	0	0	0	0	4	0	0	5	0	1	0	0	0	0	0
2012	0	0	0	0	0	0	1	0	0	0	1	0	0	3	0	0	0	0	0	0	0	0	0	0	0	0	0	0	2	0	0	0	0	0	0	0	0	0	0	0	0	2	0	3	0	0	0	0	0
2039	0	0	0	1	0	1	0	0	1	0	186	0	0	17	1	0	0	0	0	0	0	0	0	0	0	0	0	0	3	0	0	0	0	0	0	0	0	0	2	0	0	1	0	9	0	0	0	0	0
2066	0	0	0	0	0	0	0	0	0	0	22	0	0	8	0	0	0	0	0	0	0	0	0	0	0	0	0	0	0	0	0	0	0	0	0	0	0	0	1	0	0	0	3	3	0	0	0	0	0
2093	0	0	0	0	4	0	1	0	0	0	128	0	0	21	0	0	0	0	0	1	0	0	0	0	0	0	0	0	2	0	2	0	0	0	0	0	0	0	5	0	1	4	0	0	0	0	0	0	0
2120	0	0	0	0	1	0	3	0	0	0	284	0	0	13	0	0	0	0	0	8	0	0	0	0	0	0	0	0	3	0	1	0	0	0	0	0	0	0	1	0	1	2	0	1	0	0	0	0	0
2145	0	0	0	0	0	0	0	0	0	0	50	0	0	9	0	0	0	0	0	0	0	0	0	0	0	0	0	0	0	0	0	0	0	0	0	0	0	0	0	0	0	3	0	3	0	0	0	0	0
2171	0	0	1	0	0	0	0	0	0	1	385	0	0	23	0	0	0	0	0	2	0	0	1	0	0	0	0	0	2	0	2	0	0	0	0	0	0	0	0	0	3	4	0	8	0	0	0	0	0
2195	0	0	0	0	1	0	1	0	0	0	99	0	0	7	0	0	0	0	0	0	0	0	0	0	0	1	0	0	0	0	1	0	0	0	0	0	0	0	0	0	0	3	0	0	0	0	0	0	0
2220	0	0	0	0	0	0	0	0	0	0	28	0	0	2	0	0	0	0	0	1	0	0	0	0	0	0	1	0	0	0	0	0	0	0	0	0	0	0	0	0	0	0	0	0	0	0	0	0	0
2243	0	0	0	0	0	0	1	0	0	0	59	0	0	26	0	0	0	0	0	4	0	0	0	0	0	0	0	0	5	0	0	0	0	0	0	0	0	0	4	0	2	8	0	7	0	0	0	0	0
2263	0	0	2	0	0	0	1	0	0	0	297	0	0	55	0	1	0	0	0	0	0	0	0	0	0	0	0	0	5	0	3	0	1	0	0	0	0	0	2	0	1	1	0	21	0	0	0	0	0
2286	0	0	0	1	0	0	0	0	0	0	74	0	0	1	0	0	0	0	0	0	0	0	0	0	0	0	0	0	1	0	1	0	0	0	0	0	0	0	3	0	0	3	0	70	0	0	0	0	0
2308	0	0	1	0	0	1	0	0	0	0	41	0	0	15	0	0	0	0	0	0	0	0	0	0	0	1	0	0	2	0	2	0	0	0	0	0	0	0	1	0	1	6	0	1	0	0	0	0	0
2331	0	0	0	0	0	0	3	0	0	0	18	0	0	1	0	0	0	0	0	0	0	0	0	0	0	0	0	0	4	0	1	0	0	0	0	0	0	0	0	0	2	0	0	4	0	0	0	0	0
2353	0	0	0	0	0	5	1	0	0	0	62	0	0	19	0	0	0	0	0	2	0	1	0	0	0	0	2	0	4	0	1	0	0	0	0	0	0	0	0	0	0	0	0	4	0	0	0	0	0
2377	0	0	1	0	0	0	0	0	0	0	40	0	0	5	1	0	0	0	0	0	0	0	0	0	0	0	0	0	0	0	2	0	0	0	0	0	0	0	0	0	1	1	0	5	0	0	0	0	0
2400	0	0	0	0	0	0	0	0	0	0	38	0	0	3	0	0	0	0	0	0	0	0	0	0	0	0	0	0	0	0	3	0	0	0	0	0	0	0	1	0	0	3	0	2	0	0	0	0	0
2423	0	0	1	0	0	3	5	0	0	0	31	0	0	30	0	0	0	0	0	0	0	0	0	0	0	0	0	0	0	0	0	0	0	0	0	0	0	0	0	0	0	0	0	0	0	0	0	0	0
2447	1	0	0	0	0	0	0	0	0	0	9	0	0	0	0	1	0	0	0	0	0	0	0	0	0	0	0	0	0	0	0	0	0	0	0	0	0	0	0	0	1	2	0	2	0	0	0	0	0
2470	0	0	0	0	0	0	0	0	0	0	2	0	0	0	0	0	0	0	0	0	0	0	0	0	0	0	0	0	1	0	0	0	0	0	0	0	0	0	3	1	0	3	0	10	0	0	0	0	0
2494	0	0	0	0	0	0	0	0	0	0	13	0	0	3	0	0	0	0	0	0	0	0	0	0	0	0	1	0	0	0	0	0	0	0	0	0	0	0	0	0	0	1	0	2	0	0	0	0	0
2515	0	0	0	1	0	0	0	0	0	0	350	0	0	175	0	0	0	0	0	0	0	0	0	0	0	0	4	0	2	0	1	0	0	0	0	0	0	0	1	0	0	2	0	7	0	0	0	0	0
2535	0	0	0	0	0	1	0	0	0	0	119	0	0	19	0	1	0	0	0	0	0	0	0	0	0	0	0	0	3	0	1	0	0	0	0	0	0	0	0	0	0	1	0	4	0	0	0	0	0
2552	0	0	1	0	0	0	1	0	0	2	30	0	0	35	0	0	0	0	0	2	0	0	0	0	0	0	0	0	0	0	0	0	0	0	0	0	0	0	0	0	0	4	0	0	0	0	0	0	0
2570	0	0	0	0	0	0	0	0	0	0	94	0	0	14	0	1	0	0	0	0	0	0	1	0	0	0	0	0	0	0	0	0	0	0	0	0	0	0	0	0	1	0	0	5	0	1	0	0	0
2588	0	0	0	0	0	0	0	1	0	0	11	0	0	0	0	0	0	0	0	0	0	0	0	0	0	0	0	0	0	0	0	0	0	0	0	0	0	0	0	0	0	0	0	1	0	0	0	0	0
2606	0	0	0	0	0	0	0	0	0	0	444	0	0	96	0	0	1	0	0	0	0	0	0	0	0	1	0	0	1	0	7	0	0	0	0	0	0	0	0	0	3	1	0	3	0	0	0	0	0
2624	0	0	0	0	0	0	2	0	0	0	12	0	0	0	0	0	0	0	0	0	0	0	0	0	0	0	0	0	0	0	0	0	0	0	0	0	0	0	1	0	0	1	0	1	0	0	0	0	0
2642	0	0	0	0	0	0	4	0	0	0	271	0	0	156	0	0	0	0	0	0	0	0	0	0	0	0	0	2	1	0	5	0	0	0	0	0	0	0	1	0	0	3	0	17	0	0	0	0	0
2660	0	0	0	0	0	0	0	0	0	0	8	0	0	1	0	0	0	0	0	0	0	0	0	0	0	0	0	0	0	0	0	0	0	0	0	0	0	0	0	0	0	5	0	1	0	0	0	0	0
2681	0	0	0	0	0	0	0	0	0	0	18	0	0	0	0	0	0	0	0	0	0	0	0	0	0	0	0	0	1	0	0	0	0	0	0	0	0	0	0	0	1	2	0	1	0	0	0	0	0
2697	0	0	0	1	0	0	1	0	0	0	26	0	0	8	0	0	0	0	0	0	0	0	0	0	0	0	0	0	0	0	2	0	0	0	0	0	0	0	0	0	4	3	0	3	0	0	0	0	0
2715	0	0	1	0	0	0	0	0	0	0	94	0	0	7	0	0	0	0	0	2	0	0	0	0	0	1	0	0	3	0	4	0	0	0	0	0	0	0	0	1	13	4	0	2	0	0	0	0	0
2733	0	0	2	0	0	0	1	0	0	0	529	0	0	47	0	0	0	0	0	2	0	0	0	0	0	2	1	0	4	0	8	0	0	0	0	0	0	0	1	1	20	11	0	14	0	0	0	0	0
2751	0	0	0	0	0	0	1	0	0	0	156	0	0	39	0	0	0	0	0	0	0	0	0	0	0	0	3	0	0	0	5	0	0	0	0	0	0	0	0	0	1	2	0	0	0	0	0	0	0
2769	0	0	0	0	0	0	0	0	0	0	14	0	0	5	0	0	0	0	0	0	0	0	0	0	0	0	0	0	0	0	1	0	0	0	0	0	0	0	0	0	0	1	0	2	0	0	0	0	0
2787	0	0	0	0	0	0	0	0	0	0	11	0	0	7	0	0	0	0	0	0	0	0	0	0	0	0	0	0	0	0	1	0	0	0	0	0	0	0	0	0	6	3	0	4	0	0	0	0	0
2806	0	0	2	0	6	0	3	0	0	0	160	0	0	225	0	0	1	0	0	1	0	0	0	0	0	0	0	0	3	0	2	0	0	0	0	0	0	0	0	0	1	1	0	3	0	0	0	0	0
2824	4	0	6	1	1	1	7	0	0	2	1324	0	0	300	1	1	2	0	1	14	0	0	0	0	0	1	3	0	6	0	15	0	0	0	0	0	0	0	1	0	16	5	0	22	0	0	0	0	0
2843	1	0	0	0	0	0	0	0	0	0	33	0	0	24	0	0	0	0	0	0	0	0	0	0	0	0	3	0	1	0	0	0	0	0	0	0	0	0	0	0	2	0	0	4	0	0	0	0	0
2865	0	0	0	0	0	0	0	0	0	0	25	0	0	2	0	0	0	0	0	0	0	0	0	0	0	0	0	0	0	0	0	0	0	0	0	0	0	0	1	3	0	1	0	4	0	0	0	0	0
2881	0	0	2	0	0	0	0	0	0	0	377	0	0	38	0	2	0	0	0	0	0	0	0	0	0	0	2	0	11	0	3	0	0	0	0	0	0	0	0	0	9	4	0	32	0	0	0	0	0
2900	3	0	1	0	1	0	3	0	0	1	46	0	0	16	0	0	0	0	0	0	0	0	0	0	0	0	1	0	0	0	1	0	0	0	0	0	0	0	0	0	4	1	0	2	0	0	0	0	0
2918	0	0	0	0	0	0	0	0	0	0	5	0	0	0	0	0	0	0	0	0	0	0	0	0	0	0	0	0	0	0	1	0	0	0	0	0	0	0	0	0	2	4	0	7	0	0	0	0	0
2937	0	0	0	0	0	0	0	0	0	1	5	0	0	0	0	0	0	0	0	0	0	0	0	0	0	0	0	0	0	0	0	0	0	0	0	0	0	0	0	0	1	15	0	3	0	0	0	0	1
2955	0	0	0	0	0	0	0	0	0	0	0	0	0	0	0	0	0	0	0	0	0	0	0	0	0	0	0	0	0	0	0	0	0	0	0	0	0	0	0	0	0	5	0	2	0	0	0	0	0
2974	1	0	4	0	0	0	4	0	0	0	170	0	0	71	0	1	0	0	0	0	0	0	0	0	0	0	0	0	0	0	5	0	0	0	0	0	0	0	0	0	5	4	0	35	0	0	0	0	0
2993	0	0	0	0	0	0	0	0	0	0	0	0	0	0	0	0	0	0	0	0	0	0	0	0	0		0	0	0	0		0	0	0	0	0	0	0	0	0			0	0	0	0	0	0	0
3011	0	0	0	0	0	0	0	0	0	0	9	0	0	3	0	0	0	0	0	0	0	0	0	0	0	1	0	0	0	0	2	0	0	0	0	0	0	0	0	0	5	2	0	0	0	0	0	0	0
3029	0	0	1	0	0	0	0	0	0	0	316	0	0	31	0	0	0	0	0	1	0	0	0	0	0	0	0	0	3	0	3	0	0	0	0	0	0	0	0	0	12	1	0	10	0	0	0	0	0
3050	1	0	0	0	0	0	1	0	0	0	352	0	0	58	0	0	0	0	0	1	0	0	0	0	0	1	4	0	0	0	3	0	0	0	0	0	0	0	0	0	0	6	0	9	0	0	0	0	0
3068	0	0	0	0	0	0	0	0	0	1	72	0	0	11	0	0	0	0	0	0	0	0	0	0	0	0	0	0	0	0	2	0	0	0	0	0	0	0	0	0	3	8	0	6	0	0	0	0	0
3085	0	0	2	0	0	0	1	0	0	0	252	0	0	43	0	1	0	0	0	3	0	0	0	0	0	1	0	0	1	0	1	0	0	0	0	0	0	0	0	0	3	4	0	1	0	0	0	0	0
3104	0	0	0	0	0	1	2	0	0	1	27	0	0	3	0	1	1	0	0	3	0	0	0	0	0	1	3	0	0	0	2	0	0	0	0	0	0	0	0	0	4	5	0	4	0	0	0	0	0
3122	0	0	0	0	1	0	0	0	0	0	168	0	0	73	0	0	0	0	0	10	0	0	0	0	0	0	1	0	2	0	2	0	0	0	0	0	0	0	0	0	1	1	0	8	0	0	0	0	0
3141	0	0	0	0	0	0	2	0	0	0	132	0	0	37	0	0	0	0	0	5	0	0	0	0	1	2	1	0	1	0	1	0	0	0	0	0	0	0	0	1	1	7	0	18	0	0	0	0	0
3159	0	2	1	0	0	0	0	0	0	1	108	0	0	35	1	0	0	0	0	109	0	0	0	0	1	1	10	0	4	0	5	0	0	0	0	0	0	0	0	0	1	8	0	1	0	0	0	0	0
3177	0	0	0	0	0	0	0	0	0	0	158	0	0	14	0	0	0	0	0	0	0	0	0	0	0	0	0	1	1	0	1	0	0	0	0	0	0	0	0	0	6	3	0	2	0	0	0	0	0
3196	0	0	0	0	0	0	0	0	0	0	13	0	0	0	0	0	0	0	0	0	0	0	0	0	0	0	0	0	0	0	0	0	0	0	0	0	0	0	0	0	1	1	0	2	0	0	0	0	0
3213	0	0	0	0	0	0	0	0	0	0	238	0	0	40	0	0	0	0	0	24	0	0	0	0	0	0	0	0	2	0	2	0	0	0	0	0	0	0	0	0	4	1	0	7	0	0	0	0	0
3234	0	0	0	0	0	0	0	0	0	0	12	0	0	0	0	0	0	0	0	0	0	0	0	0	0	0	0	0	0	0	0	0	0	0	0	0	0	0	0	0	4	2	0	2	0	0	0	0	0
3250	0	0	0	0	0	0	2	0	0	2	40	0	0	17	0	0	0	0	0	0	0	0	0	0	0	0	0	0	0	0	1	0	0	0	0	0	0	0	0	0	1	5	0	1	0	0	0	0	0
3268	0	0	0	0	3	0	4	0	0	1	141	4	0	24	0	0	0	0	2	1	0	0	0	0	0	0	0	0	2	0	1	0	0	0	0	0	0	0	0	0	2	2	0	0	0	0	0	0	0
3286	0	0	0	0	0	0	0	0	0	0	11	0	0	1	0	0	0	0	0	0	0	0	0	0	0	0	0	0	0	0	0	0	0	0	0	0	0	0	0	0	4	2	0	4	0	0	0	0	0
3304	0	0	0	0	0	0	2	0	0	0	119	0	0	11	0	1	0	0	0	0	0	0	0	0	0	0	1	0	3	0	2	0	0	0	0	0	0	0	2	0	3	4	0	10	0	0	0	0	0
3322	0	0	0	0	1	0	0	0	0	0	93	0	0	15	0	0	0	0	0	0	0	0	0	0	0	0	0	0	0	0	2	0	0	0	0	0	0	0	0	0	5	1	0	4	0	0	0	0	0
3339	0	0	0	0	0	0	0	0	0	0	125	0	0	4	0	3	0	0	0	0	0	0	0	0	0	1	0	0	0	0	4	0	0	0	0	0	0	0	0	0	6	6	0	1	0	0	0	0	0
3357	0	0	0	0	1	0	1	0	0	2	193	0	0	56	0	1	0	0	0	5	0	0	0	0	0	0	2	0	0	0	3	0	1	0	0	0	0	0	0	0	4	3	0	0	0	0	0	0	0
3375	0	0	3	0	0	0	0	0	0	0	124	0	0	9	0	3	0	0	0	0	0	0	0	0	0	0	0	0	2	0	5	0	1	0	0	0	0	0	0	0	8	0	0	0	0	0	0	0	0
3392	0	0	0	0	0	0	0	0	0	0	104	0	0	51	0	0	0	0	0	0	0	0	0	0	0	0	4	0	3	0	2	0	0	0	0	0	0	0	0	0	2	0	0	0	0	0	0	0	0
3411	0	2	0	0	0	0	1	0	0	2	74	0	0	83	0	0	0	0	1	7	0	0	1	0	2	0	2	0	1	0	1	0	0	0	0	0	0	0	0	0	2	0	0	1	0	0	0	0	0
3426	0	1	1	1	0	0	1	0	0	0	106	0	0	31	1	0	0	0	0	0	0	0	0	0	0	2	0	0	0	0	6	0	0	0	0	0	0	0	0	0	7	4	0	3	0	0	0	0	0
3444	0	0	1	2	1	0	0	0	0	0	303	0	0	116	0	0	0	0	0	0	0	0	0	0	0	0	1	0	0	0	4	0	0	0	0	0	0	0	0	0	0	2	0	0	0	0	0	0	0
3468	0	0	0	0	0	0	0	0	0	0	26	0	0	4	0	0	0	0	0	0	0	0	0	0	1	1	1	0	1	0	1	0	0	0	0	0	0	0	0	0	6	0	0	2	0	0	0	0	0
3492	0	0	0	0	0	0	1	0	0	0	326	0	0	65	0	0	0	0	0	1	0	0	0	0	0	1	1	0	0	0	4	0	0	0	0	0	0	0	0	0	3	1	0	3	0	0	0	0	0
3516	0	0	0	0	0	0	0	0	0	0	19	0	0	5	0	2	0	0	0	0	0	0	0	0	0	0	0	0	1	0	0	0	0	0	0	0	0	0	0	0	5	2	0	0	0	0	0	0	0
3540	0	0	0	0	0	0	0	0	0	0	29	0	0	15	0	0	0	0	0	0	0	0	0	0	0	0	0	0	0	0	0	0	0	0	0	0	0	0	0	0	7	16	0	0	0	0	0	0	0
3564	0	0	0	0	2	0	0	0	0	0	29	0	0	21	0	0	0	0	0	0	0	0	0	0	0	0	0	0	1	0	0	0	0	0	0	0	0	0	0	0	0	2	0	0	0	0	0	0	0
3589	0	0	0	0	0	0	0	0	0	0	4	0	0	1	0	0	0	0	0	0	0	0	0	0	0	0	0	0	0	0	0	0	0	0	0	0	0	0	0	0	4	2	0	1	0	0	0	0	0
3614	0	0	0	0	0	0	0	0	0	0	31	0	0	11	0	0	0	0	0	0	0	0	0	0	0	0	0	0	0	1	0	0	0	0	0	0	0	0	0	0	4	1	0	0	0	0	0	0	0
3636	0	0	0	0	0	0	0	0	0	0	1	0	0	0	0	0	0	0	0	0	0	0	0	0	0	0	0	0	0	0	0	0	0	0	0	0	0	0	0	0	3	1	0	0	0	0	0	0	0
[truncated: 2 more columns]

## Sheet: XRF data
Age (yrs BP)	Zr/Rb	Br/Ti	Ca/Ti
-67	0.999227	0.463987	1.32155
-66	1.15715	-0.149666	0.772332
-66	1.34624	-0.354432	0.815204
-65	1.27972	-0.256721	0.738139
-63	1.17029	0.222563	0.789903
-61	1.34709	-0.554074	0.764082
-59	1.05569	0.3479	0.827728
-53	1.06527	0.434424	0.833431
-45	1.12776	0.443962	0.797689
-36	0.975274	0.936643	0.931131
-26	0.69325	1.27643	1.19807
-13	1.09654	0.398459	0.799367
-1	1.01974	0.993999	1.04841
13	1.17226	0.596876	0.968375
31	1.45542	-0.378263	0.777027
50	1.34395	-0.746759	0.764379
69	1.30036	0.0196147	0.892351
88	1.43109	-0.813375	0.809924
107	1.44308	-0.791094	0.826104
126	1.33608	-0.653122	0.802319
145	1.25139	-0.356028	0.741188
167	1.19335	-0.469292	0.769767
190	1.14416	-0.408965	0.747292
213	1.31363	-0.0224339	0.780619
235	0.432789	2.56537	2.09473
258	0.503595	1.23865	1.09417
281	0.931626	0.564036	0.902835
304	1.15765	0.0694845	0.85877
327	1.11255	1.1613	1.24598
350	0.722826	1.64747	1.38929
372	0.70552	1.17782	1.16205
393	0.955401	0.596062	0.952179
415	0.993196	0.919043	0.984365
436	1.07462	0.313541	0.923359
457	1.62363	0.0970699	0.790502
478	1.31012	-0.309034	0.786402
500	1.07008	0.310004	0.830458
521	0.911917	0.561843	0.879832
542	1.20711	0.154788	0.764356
561	1.27527	-0.234988	0.737838
580	1.33624	-0.515293	0.786185
600	1.28228	-0.283876	0.824152
613	1.10336	0.256854	0.885314
627	1.04677	0.0794934	0.771453
638	0.662751	1.03203	0.991881
649	0.996088	0.652687	0.882229
659	1.22008	0.922961	1.09376
667	0.779663	0.829284	0.964135
673	0.725921	1.19343	1.13258
676	0.771486	1.04924	1.09803
679	1.11207	0.246803	0.776467
681	1.19043	0.00216023	0.787304
683	1.09963	0.950148	1.02591
684	0.967573	0.78006	0.911048
685	1.19677	0.872124	0.843541
687	1.23612	0.939909	0.829165
688	1.37014	0.424369	0.840945
689	1.05593	0.734133	0.897656
689	1.13481	0.238016	0.794984
690	1.0234	0.761789	0.971419
691	1.05554	0.085283	0.690865
692	1.0315	0.177036	0.753117
693	1.16339	0.103112	1.03679
694	1.04926	-0.0558454	0.738377
695	0.968839	-0.825317	0.164144
696	1.06131	0.173968	0.754358
697	1.13625	-0.108161	0.729212
698	1.04782	-0.120336	0.716237
699	1.03033	0.0398764	0.742369
700	0.874958	0.148059	0.773943
702	0.925552	0.103227	0.733807
703	1.08994	-0.0407381	0.783377
705	1.10591	-0.38587	0.786182
706	1.13727	-0.064116	0.757168
708	1.04297	0.0970475	0.831357
710	0.818123	0.7437	0.951888
711	0.694269	1.14774	1.14283
713	0.0840992	1.8936	1.49551
715	0.66122	1.82377	1.5633
717	0.67708	1.22885	1.0823
719	0.887556	0.748355	0.901194
721	1.0166	0.615528	0.929524
723	1.07067	0.566078	0.863748
725	1.1098	0.23798	0.782362
727	0.754051	0.591831	0.84153
729	0.20033	2.06156	1.57148
732	0.528987	1.54554	1.24948
734	-0.0475191	2.31505	1.82691
736	-0.086503	2.04527	1.44443
738	0.0812463	2.25889	1.67633
740	0.14787	2.08386	1.586
742	0.889611	0.973904	1.02413
744	1.22488	0.199582	0.720608
746	1.28568	-0.0836057	0.63398
748	0.936563	0.189663	0.715607
751	0.781706	1.03681	1.00369
753	0.735437	0.659344	0.82428
755	0.552118	0.902339	0.93535
757	0.0395973	2.04995	1.59955
759	0.592145	1.287	1.10254
761	0.850877	0.450232	0.827588
763	0.937027	0.806428	0.937731
766	0.897655	0.620562	0.840783
768	1.08825	0.646744	0.808898
770	0.897196	1.09852	0.953449
772	0.364496	1.58862	1.2395
775	0.0496335	2.29976	1.73016
777	0.670263	0.874734	0.868295
779	1.2219	0.215154	0.766717
782	1.13063	0.682092	0.828107
784	0.846392	0.654316	0.850497
786	0.578616	1.39717	1.11463
788	0.0199585	1.97855	1.31788
791	0.290892	2.39637	1.86158
793	0.552926	1.65127	1.35227
795	0.334295	2.0588	1.57126
797	0.93193	0.716744	0.774041
800	1.17351	0.66198	0.802516
802	1.01504	0.781289	0.835902
804	0.932899	0.741721	0.827137
807	0.852693	0.873804	0.882861
809	0.87079	1.09864	1.03707
811	0.780607	1.28262	1.10542
813	0.623568	1.62952	1.25056
816	0.639486	1.34384	1.04111
818	0.767959	1.12149	1.02467
820	0.82015	0.809644	0.873658
822	0.796292	0.82251	0.860765
825	0.634346	1.26477	1.0152
827	0.82249	1.03738	1.02833
829	1.20289	0.226199	0.793089
831	1.06738	0.548333	0.881921
834	0.87944	0.745128	0.874201
836	0.863307	0.747066	0.891455
838	0.580714	1.61148	1.25571
841	0.175678	1.99774	1.44904
843	1.19315	1.12002	1.03295
845	1.18327	0.637036	0.841185
847	0.983786	0.725564	0.832055
849	0.860448	1.06911	0.9703
851	1.1493	0.638777	0.714382
853	1.14307	1.08629	0.996889
856	0.969466	0.805287	0.849
858	1.08516	0.628208	0.773036
861	1.01111	0.569893	0.803085
863	1.08061	0.608393	0.716567
865	1.04359	0.718349	0.826357
867	0.951693	0.526373	0.709562
870	1.24716	0.318031	0.764618
872	1.12	-0.0482458	0.678752
875	0.96083	0.0794843	0.657706
877	1.06875	0.211262	0.726754
879	1.0755	0.590748	0.822114
881	1.29013	0.179023	0.764036
883	1.04236	0.400632	0.82299
886	1.0954	0.851368	0.917666
888	1.05969	0.753133	0.93132
890	0.971442	0.766373	0.883252
892	0.741771	0.763866	0.901015
895	1.02451	0.257725	0.831096
897	1.25917	0.112185	0.799896
899	1.30982	0.00462283	0.843349
901	0.980357	0.49424	0.905849
903	0.640487	0.954596	1.0003
905	0.953923	0.586341	0.984569
907	1.26888	-0.226927	0.81392
910	1.28349	-0.326189	0.847412
912	1.17536	-0.332353	0.838927
914	1.32825	-0.374096	0.831274
916	1.23296	-0.145724	0.791701
919	1.32236	-0.127196	0.765979
921	1.26851	-0.0425853	0.854333
923	1.25553	-0.0277416	0.829254
925	1.12217	0.200504	0.771985
927	1.01651	0.353351	0.786978
930	0.617541	1.13674	1.08137
931	1.19485	0.0688792	0.744961
934	1.14209	-0.114376	0.733093
936	1.28914	-0.136557	0.739522
938	1.17786	-0.10931	0.775409
940	1.22627	-0.313457	0.648379
942	1.19073	-0.29161	0.685256
944	1.29198	-0.0258955	0.704735
946	1.10401	0.124638	0.764843
949	0.759239	0.713975	0.903299
951	0.724624	1.25258	0.943318
953	0.687046	1.16031	1.02447
955	1.01621	0.811589	0.969694
957	0.997521	0.692482	0.892744
959	0.819224	1.06139	1.04938
962	0.858211	1.02518	0.982859
964	0.820429	1.06875	0.958219
966	0.0362813	1.94827	1.44451
968	0.43383	1.51026	1.14745
970	0.0235413	2.16502	1.52754
972	-0.18273	2.22639	1.68036
974	0.520794	1.65404	1.30392
976	0.491845	1.58787	1.25977
978	0.353235	1.44621	1.15635
981	0.591391	1.20329	1.05493
982	0.885525	1.19172	1.08068
985	1.07812	0.576408	0.793225
987	1.10772	0.5468	0.725284
989	1.27105	0.320217	0.803701
991	1.18602	-0.0628504	0.678612
993	1.33004	-0.0803288	0.718135
995	1.30668	-0.0872167	0.729943
997	1.14669	-0.100351	0.657616
999	1.21565	-0.198282	0.711721
1001	1.27444	-0.229359	0.674401
1004	1.31137	-0.375364	0.683769
1006	1.28044	0.0886595	0.729034
1008	1.23539	0.355841	0.731143
1010	1.21628	-0.165454	0.634645
1012	1.0472	0.00895757	0.679076
1014	1.04265	-0.0232165	0.650254
1016	1.0398	-0.0145955	0.659484
1018	1.32493	0.0800239	0.701642
1020	1.09285	0.0382267	0.674141
1022	1.2618	-0.114271	0.703919
1024	1.34351	-0.554352	0.666318
1026	1.27792	-0.339767	0.730215
1028	1.25976	-0.231414	0.730842
1031	1.24621	-0.0927651	0.651132
1033	1.27928	-0.251049	0.743366
1035	0.960234	0.954774	1.00941
1037	0.816872	1.08553	1.04764
1039	1.17602	0.364935	0.873558
1041	1.1983	-0.160696	0.682984
1043	1.24843	-0.156002	0.712488
1045	0.697304	0.8401	1.03519
1047	0.921544	0.923741	1.14317
1049	0.677345	1.12616	1.18
1051	0.883171	1.04959	1.07299
1053	0.924064	1.11176	1.19486
1055	0.872361	0.795497	1.04859
1057	1.07656	0.653836	1.07248
1059	1.09156	0.148849	0.843373
1061	1.12233	0.140772	0.782812
1062	1.26873	0.109479	0.805766
1064	1.19963	-0.0815404	0.688193
1066	1.34186	-0.10815	0.737232
1068	1.38261	-0.0163491	0.717312
1070	1.31789	0.0418588	0.711929
1072	1.18159	-0.0689143	0.73436
1074	1.28717	-0.184087	0.718864
1076	1.18213	-0.147627	0.684756
1078	1.21896	-0.203614	0.651407
1079	1.28768	0.0455314	0.69438
1082	1.1971	0.11106	0.590955
1083	1.19141	0.0937387	0.647227
1086	1.21044	0.160463	0.708248
1087	1.12241	0.529438	0.781565
1089	0.920706	0.285782	0.57799
1091	1.07037	0.929332	0.762426
1093	0.977743	0.57701	0.776567
1095	1.15901	0.120498	0.683273
1097	1.0299	0.0868917	0.704923
1098	1.04772	-0.0449725	0.690457
1100	1.04562	-0.140177	0.690624
1102	1.17517	-0.196059	0.545528
1104	1.06085	0.226326	0.718513
1105	0.974864	0.733054	0.803716
1107	0.294282	1.63237	1.10612
1109	0.601892	1.54035	1.12296
1111	1.043	0.353027	0.711493
1113	0.947785	0.0486712	0.630581
1115	1.0727	0.204115	0.695846
1117	0.894833	0.025328	0.663197
1119	1.00751	-0.0712465	0.613689
1121	1.81002	-1.45417	-0.201856
1123	1.0665	0.168866	0.350523
1125	0.888526	1.23354	1.0382
1127	0.763006	1.09594	0.961439
1129	0.929125	0.515761	0.747209
1130	0.9151	0.275115	0.74914
1132	0.934796	0.217961	0.625386
1134	1.00265	0.220164	0.639468
1136	1.01271	0.168128	0.659097
1138	1.00008	0.157641	0.654215
1140	1.13301	0.085189	0.624053
1142	1.24239	0.250614	0.750666
1144	1.16805	0.0189304	0.652689
1146	1.09075	0.0864663	0.687477
1148	1.09757	0.175449	0.677526
1150	0.993192	0.429787	0.734018
1152	1.07638	0.418497	0.832901
1153	1.00965	0.263035	0.718693
1155	0.889374	0.349789	0.710549
1157	0.932211	0.249347	0.758326
1159	1.12393	0.163168	0.648506
1161	1.04885	0.133291	0.713797
1163	1.06305	0.223376	0.828074
1164	0.987896	0.0777416	0.718741
1167	1.01442	-0.125389	0.717131
1168	1.20022	-0.402603	0.736081
1170	1.30253	-0.405926	0.793853
1172	1.05417	0.111441	0.803903
1174	0.531371	1.34964	1.15589
1176	-0.0659011	1.90398	1.46621
1178	0.272464	1.78333	1.40433
1180	0.928952	1.25052	1.18601
1182	1.16029	-0.01496	0.703057
1184	1.19191	0.0625536	0.711662
1186	1.20935	-0.132357	0.69415
1188	1.17143	-0.128301	0.737928
1190	1.06839	0.00418182	0.83103
1192	1.16128	-0.29246	0.712217
1194	1.14334	-0.0416749	0.73372
1196	0.86829	0.859717	0.92853
1197	0.478108	1.81664	1.58742
1200	0.418878	1.57452	1.77814
1201	0.939274	1.50264	1.32193
1203	0.462472	1.86803	1.49407
1205	0.694881	1.36769	1.2531
1208	0.470843	1.38937	1.29793
1210	1.38675	0.0150973	0.965016
1211	0.921512	1.04256	1.03872
1213	0.315128	1.75102	1.38313
1215	0.936589	0.964542	0.948569
1217	1.34633	0.149314	0.782802
1219	1.27743	-0.080626	0.718148
1221	1.35096	-0.0912616	0.708103
1223	1.3049	-0.193529	0.707867
1225	1.15765	-0.165622	0.747656
1227	1.1526	-0.087962	0.827975
1229	1.3146	-0.412956	0.71903
1231	1.29587	-0.302424	0.747639
1233	1.0014	0.433013	0.865847
1235	0.513889	1.25562	1.21783
1237	0.862779	0.765165	0.934253
1239	0.850538	0.262433	0.831014
1241	1.03187	0.202965	0.869196
1243	0.387914	0.954752	0.994859
1245	0.665596	0.993445	1.1008
1246	0.628443	1.48637	1.32176
1249	0.248671	1.98187	1.5858
1250	1.07789	1.04145	1.10384
1252	0.972189	0.498755	0.98383
1254	1.09925	0.421657	0.903601
1256	0.999252	0.502963	0.965722
1258	0.949221	0.617792	0.967885
1260	0.952286	0.612298	0.883358
1262	0.964005	0.425289	0.873254
1264	0.870155	0.280765	0.882771
1266	1.12662	0.21985	0.783229
1268	0.988282	0.297983	0.755651
1270	1.23007	0.144151	0.869233
1272	1.40293	-0.215525	0.808389
1274	1.36615	-0.290313	0.695213
1276	1.23903	-0.187611	0.707467
1278	1.36274	0.197188	0.829954
1279	1.11376	0.944098	0.994668
1282	1.09866	0.627701	0.919008
1283	1.04389	0.380034	0.842745
1285	0.997571	0.514407	0.763537
1287	1.05454	0.648992	0.820308
1289	0.730751	1.3328	1.1194
1291	1.01794	0.405699	0.777593
1293	0.959853	0.388615	0.753944
1295	0.914069	0.499942	0.865747
1297	0.36367	1.67416	1.29048
1299	0.408781	1.45825	1.07309
1301	0.412054	1.71821	1.36113
1303	0.139911	2.18315	1.65909
1305	0.581399	1.78724	1.33001
1307	0.517127	1.5608	1.26558
1309	0.905531	0.926527	0.961926
1311	0.854772	1.04316	0.925068
1313	0.72599	1.04309	0.940458
1315	0.73571	1.18241	1.12007
1317	0.446913	1.44831	1.20644
1319	0.309675	1.97773	1.5087
1321	0.448025	2.1388	1.6885
1323	0.176058	1.92218	1.42916
1324	0.305023	2.00727	1.59519
1326	0.563526	1.57841	1.3593
1329	0.711087	1.70729	1.48601
1330	0.598879	1.99291	1.64215
1332	0.887573	2.33262	1.81835
1334	0.709868	2.12511	1.70926
1336	0.627923	1.39045	1.27658
1338	0.677224	1.58268	1.3261
1340	1.12314	0.428937	0.810821
1342	1.27521	0.107211	0.816305
1344	1.01942	0.581404	0.862647
1346	0.737563	1.05833	0.95
1348	0.430367	1.60752	1.32342
1350	0.130856	1.67887	1.33984
1352	0.850086	1.18958	1.07613
1354	0.436768	2.25296	1.83312
1356	0.732097	1.02015	1.0527
1358	0.774428	1.05667	1.12416
1360	0.755608	1.04321	1.09766
1362	0.275756	1.79009	1.46931
1363	0.663833	1.71006	1.48411
1366	1.11	0.644394	0.940294
1367	0.765482	1.1646	1.17479
1369	0.484062	1.56233	1.27924
1371	0.649714	1.51989	1.2429
1373	0.702315	0.669764	0.811619
1375	0.632364	1.65095	1.23203
1377	0.446584	2.38851	1.81634
1379	0.975193	2.75396	2.29331
1381	1.1158	2.50788	2.16071
1383	0.941325	2.39045	1.99025
1385	1.0519	3.05978	2.70647
1387	0.997512	2.4005	2.03441
1389	0.904183	2.57689	2.19093
1390	0.860312	1.69705	1.40518
1393	1.05676	3.03638	2.67434
1394	1.188	1.99223	1.81869
1396	0.969382	1.08363	1.06721
1398	1.0771	0.650414	0.844222
1400	1.02932	0.601776	0.89804
1402	1.11816	0.428916	0.828558
1404	0.921751	0.656533	0.973098
1406	0.707321	1.17669	1.11759
1408	0.576159	1.26034	1.23624
1410	0.33394	1.72489	1.50144
1411	0.814534	1.10653	1.09539
1414	0.673539	1.10639	1.15636
1415	0.70478	1.16167	1.07959
1417	0.272482	1.52778	1.34788
1419	0.240854	1.6263	1.7313
1421	0.550071	1.26971	1.43646
1423	0.0832845	2.13799	1.66365
1425	0.175792	2.71635	2.09486
1427	0.252838	1.75271	1.56766
1429	0.76958	0.579279	1.05736
1431	0.823137	0.802133	0.97523
1432	0.925085	0.747123	0.889834
1435	0.86893	0.525046	0.882476
1436	0.948709	0.801	0.781946
1438	1.15781	0.394069	0.754151
1440	1.07864	0.862781	0.940955
1442	1.0984	0.616819	0.872686
1444	1.15494	0.606096	0.925203
1446	1.20927	0.0136947	0.659682
1448	1.27953	0.331679	0.717929
1450	1.1246	0.502675	0.859675
1452	1.06463	0.473017	0.787592
1453	1.09599	0.868357	0.964385
1455	1.04885	0.632263	0.854737
1457	1.07594	0.160229	0.733458
1459	1.19318	0.0889421	0.768159
1460	0.939099	0.323385	0.795496
1463	0.736298	1.3069	1.09959
1464	1.09736	-0.135225	0.711914
1466	1.16702	0.172108	0.812336
1468	1.23891	0.311596	0.868093
1470	1.0797	0.425562	0.911067
1472	0.505909	1.42136	1.24724
1473	0.967765	0.875641	1.02923
1475	1.20255	0.235008	0.837975
1477	1.1458	0.0478642	0.781962
1479	1.23134	-0.343904	0.791582
1480	1.20166	0.0429079	0.88051
1482	0.987847	0.247979	0.88561
1484	1.01371	0.322411	0.869324
1486	0.925966	0.517681	0.927231
1488	1.10006	0.559678	0.938973
1489	1.13054	0.758059	1.07179
1491	1.13917	0.681519	1.16392
1493	1.03122	0.656136	0.892483
1496	0.49082	1.21292	1.12581
1498	0.413629	1.37668	1.35273
1501	0.883291	1.26677	1.42706
1503	0.982388	1.46665	1.28092
1505	0.953969	1.39244	1.27033
1507	0.871131	1.44055	1.29622
1510	1.1436	1.44228	1.84976
1513	0.99374	1.92087	1.92078
1515	0.917135	1.80339	1.77081
1518	1.02572	1.65282	1.57829
1520	0.959816	1.51295	1.51328
1523	0.907771	1.78123	1.513
1525	0.519961	1.45729	1.29177
1528	0.635954	1.73426	1.75365
1530	0.906729	1.09288	1.26123
1533	1.11118	1.14065	1.21199
1536	1.17263	1.30261	1.22347
1538	1.22021	1.62175	1.44044
1541	1.11263	0.739626	1.10749
1543	1.0069	1.06444	1.07407
1546	0.963079	0.750672	1.04269
1549	0.424672	1.53658	1.84665
1551	0.359988	2.03464	2.18078
1554	0.996323	0.577302	0.973621
1556	1.01181	0.347434	0.832026
1559	1.08191	0.535058	0.761935
1561	1.01589	0.574304	0.84904
1564	1.2343	0.433584	0.768512
1567	1.15653	0.558847	0.823658
1569	1.06936	0.939816	0.952903
1572	0.886943	1.10372	1.0502
1575	0.888872	0.786363	0.873584
1577	0.826604	1.14677	1.02732
1580	1.01316	0.973661	0.968612
1583	1.19741	0.548679	0.916061
1585	0.859353	1.37488	1.18544
1588	0.575405	1.58642	1.53358
1590	0.304494	2.07329	1.73989
1593	0.234489	2.22353	1.84347
1595	0.241106	2.70091	2.34035
1597	0.347427	2.38157	1.94248
1600	0.556913	1.69262	1.47126
1603	0.911294	1.61426	1.32252
1605	0.836065	1.96691	1.47258
1608	0.977833	2.40993	1.80094
1610	1.02927	2.47383	1.97144
1613	0.825733	3.54045	2.92265
1617	0.819469	2.337	1.84245
1623	0.994302	1.62932	1.50883
1630	0.643142	1.99967	1.53005
1636	0.711684	2.1302	1.54495
1643	0.362072	5.0447	4.24561
1651	0.269411	2.78013	1.99721
1655	0.188671	3.44831	2.67138
1659	0.634187	3.20376	2.61502
1663	0.643498	2.98655	2.48066
1667	1.19148	2.25559	1.93793
1671	1.05093	1.68536	1.40738
1675	0.661343	3.77435	3.15489
1680	1.10571	2.07791	1.73841
1687	1.13018	1.52974	1.27346
1689	1.25409	1.87331	1.5734
1691	1.05081	1.82292	1.36264
1693	1.05418	2.06011	1.61413
1696	1.15822	1.26426	1.19541
1697	1.17392	1.19728	1.07283
1700	0.875592	1.9583	1.61958
1702	0.666896	2.25192	2.00176
1705	0.933232	1.6825	1.63494
1707	1.22233	-0.0493881	0.759143
1709	0.882909	1.38786	1.15761
1712	1.12219	1.47329	1.27534
1714	0.992702	1.00023	1.06862
1716	0.942979	1.27041	1.28749
1719	1.09473	0.623747	0.884619
1721	1.01851	0.924211	1.23555
1723	0.576145	1.62905	1.41323
1726	0.380332	2.37319	2.06583
1728	0.621889	1.74695	1.76577
1730	1.00291	0.999797	1.37542
1733	0.977101	0.92402	1.42827
1735	1.17716	0.329605	1.17121
1737	1.15853	-0.0441731	1.08336
1740	1.40922	0.0881845	0.997405
1742	0.847332	1.71807	1.55312
1745	1.18256	1.95036	1.76406
1747	0.839945	1.49359	1.5557
1749	1.14194	0.912226	1.05899
1752	0.806704	0.662381	0.812058
1754	0.434186	1.52666	1.24802
1757	0.10958	2.24164	1.6339
1759	0.310155	2.39903	1.84936
1762	0.655164	1.85492	1.47516
1764	1.26342	0.325669	0.813169
1767	1.09588	0.892	1.08813
1769	0.806001	1.21792	1.15773
1772	0.709444	1.16022	1.04047
1774	0.334204	1.99158	1.5244
1777	0.0520834	1.72078	1.29648
1779	0.840365	0.811418	0.934201
1782	0.892148	0.513147	0.862932
1785	0.851392	0.650379	1.04487
1787	1.02659	0.234385	0.864679
1790	1.16207	0.552069	0.982236
1792	1.19864	0.50619	0.921975
1795	1.10329	0.652932	0.995029
1797	0.995119	0.700311	0.943225
1800	1.05416	0.431109	1.07002
1803	1.0778	0.263732	1.13149
1805	0.765218	0.802689	1.02621
1808	1.13903	0.782032	1.16566
1811	1.01223	0.344874	0.968156
1814	0.886929	0.502878	0.915411
1816	0.886837	0.425934	0.910981
1819	0.942119	0.00635998	0.772621
1822	0.959461	0.377423	0.919272
1824	0.888192	0.690068	0.947878
1827	1.04304	0.705358	0.907015
1829	0.929799	0.794896	1.07319
1832	1.09134	0.158856	0.836302
1835	1.08006	0.00338686	0.756713
1838	1.10888	-0.00177127	0.680284
1840	1.2773	0.205261	0.811779
1843	1.02533	0.349902	0.872394
1846	1.17928	0.392317	0.882857
1848	1.02895	0.672743	1.05362
1851	0.991612	0.601052	0.874755
1854	0.91032	0.442055	0.823394
1856	1.04463	0.617316	0.84756
1859	0.978872	0.716232	0.936107
1862	0.891217	1.03048	1.066
1864	1.05614	0.306465	0.834689
1867	1.11966	0.429504	0.88186
1870	0.947768	0.603318	1.28452
1872	0.772597	1.26362	1.2113
1875	1.1052	0.918491	1.07461
1878	1.02499	0.52808	0.893824
1880	0.800888	1.89696	1.6957
1883	1.08495	1.35621	1.45911
1886	1.16007	0.449957	1.00129
1889	1.12026	0.0413057	0.808712
1891	1.09733	0.127992	0.769539
1894	1.15965	0.0875325	0.731173
1897	1.19778	0.22389	0.770085
1900	1.07518	0.390978	0.921568
1902	0.964902	1.44514	1.57656
1905	1.2071	1.06606	1.21977
1907	0.756144	1.54854	1.81199
1910	0.980044	1.35489	1.32687
1913	0.964776	1.20073	1.51088
1916	0.851031	1.15585	1.19727
1918	1.08811	0.526404	0.904882
1921	1.14003	0.271815	0.75452
1924	1.11368	0.0284908	0.679245
1927	1.1943	-0.123723	0.771522
1929	1.2021	0.0847816	0.831626
1932	1.26616	0.273705	0.871017
1935	1.09177	0.509915	0.86616
1938	0.855836	0.956944	0.971577
1940	0.749184	1.58915	1.41886
1943	1.11872	1.12128	1.09295
1946	0.955325	1.10636	1.05389
1949	0.899322	1.36288	1.21331
1952	1.06287	1.29178	1.20606
1954	0.675744	2.26174	1.90065
1957	0.765588	1.86184	1.57137
1960	0.980565	1.07402	1.04392
1963	1.30936	0.690973	1.0147
1965	1.21624	0.615648	0.914375
1968	1.33466	0.642976	0.895824
1971	1.15686	0.594872	0.816869
1974	1.14603	1.09475	1.1094
1976	0.943452	1.4811	1.20269
1979	0.92979	1.0507	0.977685
1982	1.15048	0.737899	0.890585
1984	0.955381	1.25515	1.12227
1987	0.565765	1.59615	1.1937
1990	0.96775	1.13179	0.984993
1993	1.12714	0.493105	0.777327
1995	0.946091	0.249279	0.700828
1998	1.0989	-0.0681274	0.705537
2001	0.86846	-0.13029	0.843296
2004	0.979856	0.353964	0.783718
2006	1.04905	0.540407	0.759394
2009	1.1231	0.587726	0.682595
2012	1.04567	1.13236	0.988639
2015	1.00583	0.893255	0.90866
2017	0.888031	1.59406	1.26406
2020	0.939632	1.58187	1.21592
2023	1.10028	0.749439	0.790072
2025	1.22791	0.745669	0.834676
2028	1.0811	0.54003	0.80485
2031	1.19751	0.772611	0.892526
2034	0.992682	0.93651	0.882294
2037	0.84418	1.34376	1.03634
2039	1.01376	1.75993	1.42199
2042	0.694754	2.48267	1.84583
2045	1.04471	1.45448	1.16275
2047	1.0162	1.09929	0.907405
2050	1.2191	0.787335	0.948423
2053	1.1304	1.13626	0.995927
2055	0.763916	1.35193	1.00113
2058	0.673356	1.53085	1.14723
2060	0.452168	1.70687	1.46197
2063	0.607039	2.05088	1.73212
2066	0.84355	0.654544	0.819129
2069	0.986499	0.378146	0.614656
2071	0.982077	0.682958	0.670593
2074	0.994153	0.763525	1.04701
2077	0.96594	0.766162	0.833882
2080	0.928231	1.20099	1.04873
2082	1.2054	0.398741	0.769374
2085	1.1144	0.301661	0.636788
2088	0.971283	0.423502	0.680373
2091	0.982322	0.124803	0.550825
2093	1.01418	0.513422	0.738938
2096	1.18293	0.368422	0.601637
2099	1.04472	0.617162	0.670327
2101	0.96986	0.729067	0.848952
2104	0.794671	1.3611	1.12697
2106	1.08933	1.02647	1.41236
2109	1.15565	0.470004	0.870684
2112	1.16901	0.0891745	0.629194
2114	1.1502	0.294596	0.690857
2117	1.20064	0.409279	0.662922
2120	1.13756	0.724974	0.828394
2123	1.26772	0.283915	0.627116
2125	1.12877	0.311116	0.695447
2128	1.17839	0.533942	0.770956
2130	1.099	0.575082	0.808677
2133	1.10137	0.625784	0.781681
2135	1.16858	0.277745	0.773382
2138	1.05849	0.791219	0.915746
2140	0.702673	1.86159	1.48765
2143	0.612803	1.52604	1.3948
2145	1.24173	0.585907	0.822388
2148	1.22566	0.922999	0.896982
2150	1.17416	0.514626	0.745033
2153	1.06324	0.435446	0.658762
2155	1.07868	0.477128	0.675467
2158	1.1245	0.745039	0.886812
2160	1.16107	1.11558	1.0161
2163	1.16225	1.79002	1.45561
2166	1.21682	1.82627	1.5383
2168	1.30047	1.63133	1.3251
2171	1.17529	1.69517	1.49515
2173	1.32013	1.41962	1.12755
2175	1.08051	1.52043	1.19076
2178	1.07809	0.759544	0.817157
2180	1.03623	1.08202	1.02147
2183	1.01663	0.990135	0.963476
2185	0.954095	1.21894	1.07758
2188	0.254936	2.25916	1.6391
2190	0.878767	0.984451	0.883797
2193	1.13936	0.246539	0.705657
2195	1.07931	0.20902	0.660242
2198	1.08591	0.500506	0.698872
2200	1.26676	0.614353	0.749345
2202	1.21276	1.27231	1.05145
2205	1.48711	0.826116	1.05643
2207	1.18	0.85765	0.982401
2210	0.776804	2.10856	1.62267
2212	0.0305796	3.49931	2.63679
2215	1.00177	1.83173	1.58315
2218	0.964494	1.22039	1.02759
2220	0.912134	1.03749	0.947222
2222	1.09412	1.205	0.997658
2225	0.585004	1.79065	1.53999
2227	0.989839	1.73973	1.59144
2229	1.52038	-0.184177	0.760365
2231	1.04461	0.145295	0.697813
2234	1.21634	0.0732362	1.00661
2236	1.34846	-0.32689	1.11588
2238	0.940232	0.720352	0.82655
2240	0.891043	0.886026	0.926934
2243	0.905746	0.327556	0.814067
2245	0.312098	2.00499	1.50712
2247	0.568851	1.48592	1.12925
2249	0.878955	0.990279	1.10382
2251	0.667374	1.1115	1.124
2254	0.691137	1.10257	1.23404
2256	1.09748	0.790039	1.15719
2258	1.19068	0.136814	0.80898
2260	0.704785	1.65797	1.39657
2263	0.634393	1.45464	1.33195
2265	0.874263	1.13642	1.154
2268	0.829585	0.970632	1.04606
2270	1.08776	0.390211	0.736352
2272	1.05294	0.114797	0.730972
2274	1.11164	0.695851	0.94318
2277	1.06641	0.455173	0.868597
2279	1.05614	0.680606	0.860723
2281	1.05682	0.482201	0.78038
2283	1.09843	0.250722	0.706152
2286	1.1701	0.193669	0.616576
2288	1.10837	1.44257	1.3768
2290	1.07865	1.3931	1.20447
2292	0.90069	2.38717	1.91822
2294	0.947873	2.06292	1.71681
2297	0.572704	2.52872	1.95027
2299	1.04607	1.61636	1.4338
2301	1.12741	1.80388	1.61139
2304	1.04539	1.94734	1.58177
2306	0.265517	2.93034	2.21924
2308	0.698749	2.53127	1.97056
2310	0.497639	2.74163	2.16901
2313	0.967652	1.58993	1.36048
2315	0.921791	1.43433	1.19453
2317	1.11484	1.40527	1.20079
2319	1.02102	1.35062	1.19782
2322	1.08968	2.04772	1.61738
2324	0.933606	2.10803	1.71091
2326	0.954163	1.83814	1.45192
2329	1.35619	0.883427	0.971647
2331	1.13046	2.20063	1.7637
2333	0.82223	2.56612	1.96402
2335	0.538208	2.29008	1.80773
2338	0.901425	2.0014	1.50514
2340	0.853008	2.05621	1.54765
2342	0.846044	2.34269	1.79277
2344	1.06741	1.35708	1.12475
2347	1.08946	1.35002	1.15559
2349	1.07215	1.27252	1.07604
2351	1.18299	1.4182	1.21481
2353	1.22869	1.09211	1.04653
2356	0.925852	1.58775	1.28359
2358	0.769816	2.33238	1.70475
2360	0.664762	3.11873	2.50902
2363	0.678614	2.08499	1.57988
2365	1.07038	0.938887	1.06236
2368	1.08843	0.804295	0.858556
2370	1.20605	1.53284	1.23771
2372	0.88491	2.18457	1.62499
2374	1.01133	2.45663	1.97094
2377	1.08659	1.91927	1.4867
2379	1.13231	1.56871	1.24356
2381	1.05707	1.00267	0.97576
2383	1.22436	0.996963	0.999442
2386	1.14642	0.925958	0.895607
2388	1.00882	1.26669	1.08378
2391	1.13493	1.06922	0.99292
2393	1.07276	1.28241	1.07946
2396	1.06413	1.22242	1.00312
2398	1.06549	1.51598	1.19503
2400	1.11725	1.53669	1.21705
2402	1.04117	1.53167	1.20742
2405	1.03716	1.84347	1.50054
2407	0.755645	2.70746	2.11747
2409	0.849232	1.95894	1.52379
2411	0.698094	3.08743	2.52441
2414	0.514481	2.61489	2.27858
2416	0.719897	2.21472	2.06512
2419	0.753828	2.045	1.66161
2421	0.577744	2.26607	1.66775
2423	0.873075	1.87165	1.45613
2425	0.858921	1.87959	1.56699
2428	1.08025	1.06699	0.935492
2430	1.16601	0.855895	0.862087
2432	0.935642	0.744627	0.668598
2435	1.25729	0.773645	0.778063
2437	0.93257	1.08618	0.865739
2440	1.13845	1.11583	0.848372
2442	1.1242	1.16262	1.06794
2444	1.09323	0.888258	0.812081
2447	1.08823	1.21545	0.966606
2449	1.04319	1.04688	0.89603
2452	1.06529	0.704283	0.678381
2454	1.01315	0.420144	0.507605
2456	0.947661	0.61491	0.686479
2458	0.818304	0.519465	0.635788
2461	0.847202	0.711886	0.682465
2463	1.13301	0.831188	0.655919
2465	0.790756	1.1511	0.918317
2468	0.849449	1.09281	0.788257
2470	0.936611	0.748651	0.662387
2472	0.87261	0.897179	0.806002
2474	0.327655	1.68998	1.1457
2477	0.726562	1.05434	0.987881
2479	0.767299	1.34207	1.15515
2481	0.821929	0.664077	0.907075
2484	0.983056	-0.302726	0.63573
2486	0.487837	2.01018	1.53495
2488	0.55064	1.99149	1.84972
2490	0.604061	1.18445	1.81793
2492	0.966238	0.421141	0.940007
2494	1.17053	0.110446	0.806165
2497	0.840432	1.56042	1.15049
2499	0.53606	1.99192	1.74887
2501	0.971305	1.1857	1.13531
2503	1.06183	0.879992	0.928198
2505	0.799353	1.10872	0.960561
2508	1.09298	1.04545	1.02728
2510	0.85673	1.74964	2.1386
2513	1.1779	0.336304	1.18994
2515	0.562898	2.15717	1.55241
2517	0.749761	1.34786	1.1483
2519	0.955188	0.511976	0.693026
2522	1.03993	0.590584	0.660844
2524	1.06937	0.829088	0.900164
2526	1.08265	0.836357	0.919594
2528	0.976418	0.512163	0.689078
2529	0.966185	0.531487	0.733755
2531	0.983464	0.47059	0.690073
2533	1.14566	1.13238	0.976196
2535	1.0451	0.963026	0.890018
2537	0.490103	2.6906	2.01545
2538	0.764453	2.60604	2.19899
2540	0.677445	2.37388	1.83497
2542	0.922052	0.77837	0.848622
2544	1.00332	0.87583	0.955499
2545	0.969236	1.38511	1.24736
2547	1.01204	2.54877	1.9586
2549	0.630485	3.45868	2.74248
2551	0.378658	2.69879	2.2157
2552	0.949269	1.6673	1.39198
2554	1.09766	1.92264	1.5222
2556	0.422516	2.8427	2.01153
2558	0.477124	2.50615	1.94198
2559	0.643153	2.32805	2.00198
2561	0.612733	1.65318	1.2043
2563	0.779457	1.02194	0.757976
2565	0.827875	0.838253	0.744785
2567	1.10558	0.887283	0.7432
2568	1.01301	1.07574	0.906048
2570	1.14229	0.811979	0.785137
2572	1.05452	1.35483	1.05946
2574	1.19072	2.28269	1.74608
2576	0.644223	2.3908	1.71011
2577	0.942024	1.76528	1.25671
2579	1.09791	1.30442	1.14697
2581	0.336288	2.17161	1.43206
2583	0.784019	1.41409	1.02744
2584	1.16792	0.949234	0.816491
2586	1.09303	1.33	1.02184
2588	1.02647	1.56555	1.11511
2590	0.848842	2.52043	1.8853
2592	0.934885	1.58811	1.12206
2593	1.00449	2.06418	1.42874
2595	1.23049	1.88224	1.38284
2597	1.11013	1.46422	1.01675
2599	0.958514	1.97899	1.37019
2601	1.17748	0.887524	0.757205
2603	0.933327	2.17786	1.52365
2604	0.826584	1.71826	1.15489
2606	0.153732	2.87419	1.97534
2608	0.922715	1.593	1.16163
2610	0.911157	0.948997	0.780936
2612	0.839375	0.899215	0.805278
2613	1.04317	1.18163	0.870315
2615	1.16246	1.28831	1.09797
2617	1.01351	1.73297	1.30714
2619	0.806963	2.66725	1.96996
2620	0.7066	2.55946	2.16109
2622	0.519303	2.16941	1.65891
2624	0.920987	1.31318	0.99138
2626	0.883095	1.44693	1.00642
2628	0.947125	1.57165	1.15672
2630	0.787317	1.45782	1.10589
2632	1.0178	1.10362	1.00552
2633	0.895607	0.884093	0.920194
2635	1.08376	0.852909	0.852553
2637	1.16247	1.13097	0.930319
2639	1.17955	1.39334	1.01621
2641	0.394884	2.7568	1.95569
2642	0.472451	2.30738	1.46712
2644	0.771174	1.6616	1.1549
2646	0.832942	1.60853	1.16636
2648	0.438005	2.35114	1.624
2650	0.0432721	2.582	1.73818
2651	0.545028	1.89806	1.33415
2653	1.06461	0.999633	0.815962
2655	0.744414	1.63894	1.0821
2657	0.405902	2.75226	1.91261
2659	0.678436	1.90356	1.35745
2660	0.826322	1.25206	0.990175
2662	0.925989	0.512803	0.752472
2664	1.07347	0.0336322	0.662657
2666	1.05254	0.555719	0.814406
2668	1.07462	0.0800563	0.752244
2669	1.01743	-0.11786	0.634044
2671	1.07641	-0.0982055	0.671408
2673	1.29532	-0.48739	0.634922
2675	1.14482	-0.50386	0.636899
2677	1.26112	-0.59451	0.596667
2679	1.25063	-0.582037	0.615831
2681	1.2304	-0.268134	0.695956
2682	1.05383	-0.0838251	0.643546
2684	1.27568	0.0998172	0.62687
2686	1.16137	0.0364927	0.65138
2688	1.3275	0.515184	0.788003
2690	1.16932	0.933947	0.896832
2691	1.23794	1.35479	0.979881
2693	1.1125	1.26269	1.05073
2695	1.11709	1.01292	0.875281
2697	1.09179	1.1431	0.867627
2698	1.06399	1.77415	1.19144
2700	1.01256	1.9714	1.33966
2702	0.977098	1.45699	1.06883
2704	1.12205	1.36704	0.947832
2706	1.09315	1.18362	0.809309
2707	1.01177	0.931519	0.742088
2709	1.1035	1.61893	1.17149
2711	0.959337	1.33852	0.949244
2713	1.20385	1.04293	0.917156
2715	1.23298	1.21218	0.897677
2717	0.840029	1.6714	1.25635
2718	1.16226	0.800812	0.742265
2720	0.936943	0.817023	0.737625
2722	1.10609	0.498671	0.641781
2724	0.978228	0.598411	0.742484
2725	1.17623	0.473135	0.701651
2727	1.08998	0.285398	0.601442
2729	0.790897	0.639776	0.62932
2731	0.896822	0.853937	0.809942
2733	0.856654	1.48552	1.37586
2735	0.927611	1.77183	1.63964
2737	0.775719	2.29425	1.62906
2738	0.98256	0.54434	0.605591
2740	1.02621	0.846331	1.83079
2742	1.22357	0.797096	1.03871
2744	1.11618	1.18214	0.962009
2745	1.04024	1.68797	1.21559
2747	1.30098	0.709718	0.798738
2749	1.19686	1.23338	0.952941
2751	1.09252	0.985794	0.744316
2753	1.05785	1.15623	0.881444
2755	1.19154	0.90558	0.77367
2757	1.24613	0.736721	0.740417
2758	1.15185	1.14995	0.934044
2760	0.672122	1.94792	1.23194
2762	1.11094	1.647	1.09227
2764	1.27281	1.00142	0.788421
2766	1.07018	1.68234	1.09383
2767	1.20994	0.725454	0.748914
2769	1.18134	0.572591	0.597276
2771	1.31573	0.733969	0.722562
2773	1.02143	0.952977	0.784151
2775	1.20544	0.878271	0.756406
2776	1.41837	1.19927	0.910418
2778	1.09764	1.5892	1.06152
2780	1.18859	1.81354	1.29202
2782	0.700967	2.12731	1.40736
2784	0.624437	2.85272	1.93129
2786	1.08336	0.616635	0.727435
2787	1.15769	0.613047	0.710583
2789	1.19823	0.517076	0.748717
2791	0.858906	1.99057	1.28036
2793	0.806129	1.66772	1.1038
2795	-0.0205082	2.93501	2.0277
2797	0.424005	2.82742	2.2128
2798	0.883683	1.2887	1.0764
2800	0.938382	1.0515	1.00695
2802	1.14463	1.04959	0.971813
2804	1.3165	0.0705856	0.886542
2806	0.829059	1.31126	1.08881
2808	0.939299	1.34215	0.978217
2809	0.944012	0.797808	0.743972
2811	1.11291	0.973181	0.84085
2813	1.33581	0.492933	0.70309
2815	1.09744	0.333459	0.635833
2817	1.08754	0.700316	0.699378
2818	1.43183	0.380786	0.705281
2820	1.33681	-0.140641	0.666636
2822	1.28589	0.16473	0.628979
2824	1.12386	0.577763	0.677901
2826	0.758406	1.38253	0.858465
2827	0.685488	1.02742	0.778092
2830	0.713186	1.61052	1.09939
2831	0.253796	2.22678	1.3905
2833	0.615776	2.43904	1.72366
2835	0.534781	1.96575	1.41206
2837	0.828602	1.82559	1.39505
2839	0.418814	2.12463	1.56229
2841	1.06761	0.530377	0.826812
2843	1.2808	0.185545	0.847236
2844	1.04243	0.563794	0.797754
2846	1.08286	-0.0915623	0.671536
2848	0.944362	0.995599	1.28887
2850	0.92643	1.01847	1.38277
2852	1.28584	0.256881	0.974419
2854	0.4773	1.67283	1.38408
2856	0.984351	0.181436	0.700186
2857	1.10352	0.0154629	0.740836
2859	1.19444	0.054301	0.680716
2861	1.13039	0.0870841	0.649651
2863	1.15937	0.0562987	0.639411
2865	1.07729	0.00197376	0.621962
2866	1.07765	0.189389	0.672034
2869	1.2011	0.4876	0.717618
2870	1.2912	0.244679	0.753216
2872	1.23575	0.0844816	0.649914
2874	1.31587	-0.163745	0.699942
2876	1.18872	0.367549	0.708396
2878	1.21634	0.588963	1.00819
2879	1.10833	0.919831	0.924746
2881	1.16274	0.994484	0.862043
2883	1.04688	1.23714	1.10175
2885	1.14431	0.854404	0.792782
2887	0.801433	1.71009	1.22223
2889	0.705612	2.27638	1.83984
2890	0.608498	1.49641	1.22065
2892	0.820836	1.78904	1.39188
2894	0.823555	0.928221	0.841274
2896	1.12012	1.61848	1.22288
2898	1.37936	1.22118	1.11039
2900	1.18778	1.46809	1.39706
2902	1.0983	1.4415	1.57475
2903	1.25114	1.55551	1.51951
2905	0.772758	2.39033	1.66113
2907	0.840032	2.47094	1.83101
2909	1.01049	1.81693	1.31287
2911	0.877874	1.74356	1.16544
2913	0.983247	1.3056	0.894207
2914	1.03662	1.04306	0.840435
2916	1.21545	1.37595	0.957516
2918	1.00992	1.40433	0.97357
2920	1.16169	1.32771	0.864019
2922	1.02802	1.30103	0.841879
2924	1.04444	1.25905	0.872856
2926	1.21483	1.13787	0.933997
2928	1.04017	0.728992	0.663998
2930	1.06944	0.827466	0.701283
2931	1.03547	0.961408	0.791704
2933	0.861777	1.50759	0.972443
2935	1.12575	0.626036	0.688848
2937	0.894497	0.867736	0.793485
2939	1.07425	0.990193	0.94503
2941	1.07184	1.15147	0.877274
2943	0.837432	1.38886	0.948921
2945	0.971875	1.79279	1.27083
2946	0.958554	1.51078	1.1105
2948	1.11525	1.22899	1.0522
2950	1.25765	0.974227	0.988353
2952	1.02277	1.24843	1.05197
2954	1.31705	0.240904	0.63817
2955	1.07738	0.906685	0.840422
2957	1.34863	0.372321	0.715734
2959	1.03233	0.828193	0.845485
2961	1.11977	0.662402	0.892076
2963	1.05742	0.66124	0.765848
2965	1.21518	0.412169	0.665989
2967	1.13904	0.542476	0.800606
2968	1.19954	0.55353	0.776173
2970	1.17745	0.556505	0.853101
2972	1.31097	0.0201337	0.717518
2974	1.25791	0.188112	0.745046
2976	0.9638	0.665735	0.716284
2978	1.16614	0.421188	0.69714
2979	1.22004	0.15964	0.730583
2981	1.11996	0.485235	0.761804
2983	0.995387	0.969771	0.960017
2985	0.895132	1.22008	1.10072
2987	1.03075	0.633573	0.869455
2989	1.09955	0.855974	0.911948
2991	1.18641	0.52979	0.792428
2993	1.07536	1.18143	0.966473
2994	0.785456	1.41118	1.30839
2996	0.857488	1.88183	1.73976
2998	0.597076	1.76575	1.38995
3000	1.179	0.492174	0.824132
3002	1.22348	0.0624159	0.648001
3003	1.04383	0.42145	0.725218
3005	1.07969	0.655127	0.704863
3007	1.11315	0.471658	0.747734
3009	1.22239	0.226348	0.760568
3011	1.17554	0.471555	0.847878
3013	1.04754	0.416683	0.727876
3015	1.13216	0.232975	0.65735
3016	1.1075	0.470631	0.780763
3018	1.17703	0.534662	0.855338
3020	1.05483	0.742251	0.903265
3022	1.02358	0.572788	0.760169
3024	1.07347	0.890654	0.846966
3026	0.988587	0.914429	0.920334
3028	0.925715	0.690663	0.825716
3029	1.12525	0.540227	0.826278
3031	1.29729	0.12732	0.694501
3033	1.40877	-0.115484	0.703463
3035	1.26497	-0.0614307	0.652333
3037	1.0957	0.37933	0.852264
3039	1.27157	-0.198592	0.829835
3041	0.329785	1.19977	1.12165
3042	1.21797	-0.374035	0.851062
3044	1.23113	-0.625788	0.763864
3046	1.1837	-0.393434	0.741561
3048	1.08829	-0.372423	0.736198
3050	1.19408	-0.333048	0.756174
3052	1.17239	-0.345174	0.930893
3054	1.40663	-0.352219	0.854787
3055	1.38871	-0.28265	0.854212
3057	1.18168	-0.250216	0.718238
3059	1.09567	-0.326128	0.673984
3061	1.26933	-0.357028	0.67409
3063	1.29972	-0.28173	0.681429
3065	1.00509	-0.163503	0.623154
3067	1.27873	-0.0867727	0.740627
3068	1.40964	-0.183681	0.871272
3070	1.24	-0.122343	0.717303
3072	1.19414	-0.0255059	0.72159
3074	1.14245	0.0521727	0.784552
3076	1.05619	0.122762	0.637504
3078	1.1549	-0.126098	0.696185
3080	1.10451	-0.0359924	0.665197
3081	1.27508	0.205559	0.791086
3083	1.02382	0.580403	0.826496
3085	0.986166	0.772585	0.839788
3087	0.86636	0.605248	0.888701
3089	0.915786	0.688617	0.967475
3091	1.02677	-0.108981	0.721145
3092	0.895421	0.121045	0.597457
3094	1.13104	-0.163386	0.657101
3096	1.17707	-0.0636183	0.614937
3098	0.990698	0.122398	0.71009
3100	1.13124	0.64136	0.825732
3102	1.14158	0.110555	0.872926
3104	1.18611	0.0681313	0.957877
3106	0.981292	0.735461	0.79222
3108	1.20879	-0.146923	0.631842
3109	1.02906	0.223234	0.697059
3111	1.45525	-0.609359	0.609802
3113	1.11505	-0.238851	0.609403
3115	1.1585	0.0766955	0.776461
3117	1.0509	-0.0564691	0.77741
3118	1.33734	-0.160966	1.06666
3120	1.0074	0.447767	0.979032
3122	1.19018	0.257302	1.09838
3124	1.22421	-0.192985	0.775701
3125	0.994636	0.436321	1.42711
3127	1.14138	-0.315905	0.944043
3129	1.39779	-0.286716	0.866432
3131	0.951284	0.522829	1.09589
3133	1.11404	0.330347	0.977619
3135	0.909114	0.50598	0.89785
3136	0.554948	1.41156	1.15501
3138	1.02741	0.417815	0.910434
3141	1.02062	-0.319495	0.778283
3143	1.24307	-0.2532	0.732433
3144	1.19387	-0.160101	0.967065
3146	1.22526	-0.1762	0.718317
3148	0.739083	0.685184	0.953797
3150	0.392839	1.644	1.52433
3151	1.32459	0.0995984	1.15725
3153	0.771816	0.345958	1.13892
3155	0.989577	0.312064	1.01791
3157	0.626071	1.15399	1.13166
3159	1.1573	0.141	0.833088
3161	0.988049	0.109042	0.803894
3162	1.22773	-0.0488917	0.822996
3164	1.16778	-0.261704	0.747068
3166	1.12966	0.247561	0.914657
3168	0.886262	0.810994	1.07484
3170	0.726716	1.24293	0.931973
3171	1.20646	-0.436392	0.642364
3173	1.22931	-0.658546	0.684818
3175	1.19872	-0.744661	0.66723
3177	1.23377	-0.648236	0.753542
3179	1.06796	0.0246392	0.690263
3181	0.983278	-0.0233398	0.727205
3183	0.919072	0.426402	0.746168
3184	1.003	0.360055	0.757423
3186	1.10032	-0.0599954	0.626011
3188	1.39937	-0.492497	0.612194
3190	1.14388	0.197715	0.745968
3192	1.48495	-0.523173	0.635913
3194	1.44615	-0.587003	0.676382
3196	1.18548	0.268028	0.663179
3197	0.929102	0.173861	0.564181
3199	0.918482	0.95399	0.880007
3201	1.0701	0.0779679	0.699628
3203	1.21595	0.0752618	1.70714
3205	1.05253	-0.0356896	0.738067
3206	1.24349	-0.261908	0.747819
3208	1.0635	-0.135583	0.81404
3210	1.25675	-0.492921	0.717978
3212	1.12272	0.0165455	0.671716
3213	1.33478	-0.238226	0.673206
3215	0.350221	1.33092	0.890262
3217	0.476785	1.26533	0.936207
3219	0.741867	0.671366	0.8814
3221	0.530268	1.35081	1.05959
3223	1.04287	0.128416	0.633658
3225	0.829685	0.0904465	0.671759
3226	1.17774	-0.302036	0.669507
3228	1.18042	-0.423986	0.612787
3230	1.22676	-0.493852	0.621771
3232	1.18035	-0.165692	0.688349
3234	0.915877	0.195484	0.672362
3236	1.02538	-0.00801049	0.718197
3237	0.95659	0.119961	0.728822
3239	0.921635	0.315772	0.828601
3241	0.877755	0.448855	0.804617
3243	1.13092	0.567705	0.845836
3245	0.918081	0.678362	0.808903
3246	1.0328	0.564711	0.746739
3248	1.1328	0.138704	0.819766
3250	1.08788	0.566332	1.0529
3252	1.10696	0.132018	0.713552
3253	1.21181	0.260047	0.928757
3255	1.06938	0.300821	0.774517
3257	0.83924	1.05949	1.32603
3259	1.02761	1.29656	1.89147
3261	1.15183	0.499689	1.06277
3263	0.841692	0.954735	1.64412
3264	1.05682	0.214107	0.996127
3266	0.939092	0.338611	1.12828
3268	1.4235	0.319333	1.12729
3270	0.843531	1.12576	1.50195
3272	1.28794	0.414137	0.888289
3273	0.735665	1.3322	1.17882
3275	1.26051	0.227162	0.994918
3277	1.32848	-0.737437	0.611532
3279	1.30887	-0.677514	0.583463
3280	1.2845	-0.0177551	0.719362
3282	1.08439	0.183552	0.731742
3284	0.972693	0.0564163	0.597946
3286	0.977167	0.515988	0.826595
3288	0.982297	0.639573	0.920034
3289	0.94815	0.698625	0.87359
3291	0.875324	0.556434	0.880485
3293	0.863458	0.680621	0.880145
3295	0.77402	0.999016	1.05125
3297	1.07549	-0.00428707	0.706912
3299	0.961068	0.790096	0.855644
3301	0.636117	1.34095	1.00897
3302	0.959336	0.939459	0.8516
3304	1.08187	0.186885	0.734982
3306	1.05906	0.0199503	0.656094
3308	0.699881	0.865932	0.846265
3310	0.866737	0.717915	0.789409
3311	1.09553	-0.197012	0.615714
3313	1.26904	-0.312346	0.603341
3315	1.18344	-0.112379	0.65452
3317	1.03721	0.24553	0.617948
3318	1.05005	0.593012	0.741235
3320	0.610708	1.64325	1.41923
3322	1.28547	0.119703	0.808451
3324	1.37481	-0.0407886	0.695031
3325	1.12034	0.507034	0.818163
3327	1.06186	0.293916	0.651357
3329	0.956108	0.242814	0.694174
3331	1.0472	0.0156066	0.644854
3333	1.0454	-0.012562	0.675744
3334	0.881295	0.585623	0.784313
3336	1.00562	0.098485	0.735748
3338	1.02438	-0.0359978	0.727738
3339	1.12527	0.377981	0.801953
3341	0.711544	1.01751	0.875886
3343	0.615037	1.53032	1.37832
3345	1.03412	0.860578	0.97503
3346	1.01061	0.17045	0.625684
3348	1.04535	0.246973	0.715136
3350	0.987588	0.179631	0.721001
3352	1.17561	-0.271178	0.738711
3353	1.18239	-0.35889	0.688702
3355	1.09055	-0.387519	0.652353
3357	1.04184	-0.452968	0.63439
3359	1.19557	-0.470095	0.651233
3360	1.12654	-0.334661	0.690911
3362	1.20069	0.00487657	0.681083
3364	1.0987	-0.0207085	0.705347
3366	1.20783	-0.161432	0.646251
3368	1.09597	-0.17137	0.656924
3370	1.13911	-0.199325	0.670654
3371	1.31028	-0.0114953	0.703078
3373	1.22114	0.357903	0.802365
3375	1.27073	0.199074	0.76472
3376	1.16498	0.0565249	0.725178
3378	1.28991	-0.274197	0.698968
3380	1.24755	-0.0158374	1.11267
3381	1.07243	0.09409	0.814962
3383	1.12624	0.0944738	0.644233
3385	0.712221	1.11688	1.0414
3387	1.30108	0.747158	0.867641
3388	1.17296	0.286043	0.640274
3390	1.10498	0.0405916	0.878115
3392	1.3281	-0.300499	0.706341
3394	1.23053	0.145948	1.06363
3395	1.31691	-0.0315617	0.928835
3397	1.25841	0.145401	0.972504
3399	1.08137	-0.095413	0.938158
3400	0.979305	0.0216281	1.08883
3402	0.971041	-0.0162038	1.32797
3404	0.883686	0.405294	0.699642
3406	0.992198	0.00340286	0.589402
3408	1.13628	0.10199	1.31845
3409	1.10476	0.310688	0.825634
3411	0.789147	0.78314	0.679677
3413	1.04982	0.0564846	0.635087
3414	1.1677	-0.325583	0.585276
3416	0.966873	0.172793	0.527442
3418	1.3032	0.0822337	0.584773
3420	1.08519	-0.349185	0.57541
3421	1.32931	-0.266108	0.534331
3423	1.08243	-0.186175	0.7916
3424	1.05796	-0.047925	1.34872
3426	1.15919	-0.288697	0.510701
3428	1.16697	-0.30701	0.497134
3429	1.146	-0.386801	0.727816
3431	1.20127	-0.13984	0.54824
3433	1.10451	-0.00807056	0.441587
3434	1.26335	0.09933	0.741728
3436	1.22218	0.0651327	0.601537
3438	1.32881	0.082185	0.563688
3439	1.40008	0.020332	0.557021
3442	1.23778	-0.144009	0.522097
3444	1.28962	-0.0653421	0.547053
3447	1.32182	-0.00553269	0.482573
3449	1.29774	-0.122199	0.524302
3451	1.09028	0.428144	0.546718
3454	0.984518	0.477741	0.596531
3456	1.24385	0.0319054	0.500432
3459	1.18727	0.0815888	0.461602
3461	1.18374	0.455805	0.289095
3463	1.22224	0.552036	0.466541
3466	1.28671	0.353256	0.423088
3468	1.14265	0.234301	0.406644
3470	1.19623	0.242423	0.44842
3473	1.3698	-0.0185108	0.467874
3475	1.41085	-0.353952	0.53621
3477	1.24454	-0.0054158	0.482471
3480	1.37256	-0.120509	0.455959
3482	1.32922	-0.0838747	0.709012
3485	1.2176	0.17895	0.595918
3487	1.16686	0.621678	0.764312
3490	1.06766	0.852179	0.591149
3492	0.82877	1.84562	0.900653
3494	0.326443	3.17995	1.92724
3497	0.821362	1.98113	1.26417
3499	1.16704	0.34481	0.539372
3501	1.12774	-0.308904	0.590835
3503	1.28929	-0.459855	0.525305
3506	1.30672	0.153688	0.41823
3509	1.09206	0.834036	0.542927
3511	1.11845	0.834809	0.521809
3513	1.12498	1.36297	0.735448
3516	1.05898	1.02122	0.696579
3518	0.930275	0.996141	0.50969
3521	0.932386	0.772486	0.468014
3523	1.14321	0.28664	0.490755
3526	1.08682	0.564356	0.530923
3528	1.17984	0.508176	0.454694
3531	1.03569	0.7473	0.539477
3533	1.13206	0.932254	0.496234
3535	1.14074	0.616168	0.425319
3537	1.02288	0.540221	0.481274
3540	1.15653	0.532193	0.478305
3542	1.18521	0.549082	0.457126
3544	1.0912	1.35449	0.730153
3547	1.17665	1.20583	0.694137
3549	0.976333	1.29225	0.667835
3552	1.11302	1.32756	0.679331
3554	1.35325	0.721126	0.534385
3557	1.08732	0.866932	0.634535
3559	1.06165	1.18572	0.627856
3561	0.978806	1.02148	0.63863
3564	1.1191	1.00168	0.635333
3566	1.02189	1.45213	0.961663
3569	1.2327	0.986574	0.698578
3572	1.20852	1.08741	0.816795
3574	1.19796	0.383171	0.59494
3577	1.20408	0.23623	0.651952
3579	1.0197	0.953594	0.619527
3582	1.17381	0.0258493	0.545156
3584	1.16384	-0.203797	0.594821
3586	1.10973	-0.18546	0.63153
3589	1.27761	-0.0658848	0.619304
3591	1.1547	-0.157646	0.61127
3594	1.1561	-0.153541	0.600673
3596	0.968928	0.229262	0.629025
3599	1.15926	0.041152	0.599224
3601	0.83957	0.675616	0.921166
3604	0.93777	0.68869	0.979415
3606	1.19195	0.518785	1.05419
3609	1.03881	0.412606	0.92269
3612	0.707609	0.796501	0.906018
3614	1.15085	0.313582	0.552111
3616	1.0877	0.194385	0.648861
3619	1.08003	0.0565122	0.559477
3621	1.06141	-0.0728508	0.641527
3624	1.29502	-0.167859	0.767885
3626	1.08174	0.694671	0.756074
3629	0.988447	0.220543	0.817559

## Sheet: Accumulation fluxes
Age (yrs BP)	BFAR	PFAR	IRD
-66	0	0	0.274951
-26	0.138882	0.0462942	0.0462942
50	0.292042	0.0365052	0
145	0.442036	0	0.0680055
258	0.760366	0.152073	0
372	0.137849	0	0
478	0.494445	0.0183128	0
580	0.7118	0.18369	0.0229613
679	2.20247	0.0898967	0.134845
691	5.78704	0	0.186679
696	4.40352	0	0.27522
708	7.82007	0	2.4882
727	0.575855	0	0
748	2.60254	0	0.520509
770	7.36483	0	0.566525
793	1.14846	0	0
816	1.49427	0	0
838	1.18763	0	0.791756
861	4.65787	0	2.32893
881	0	0	0
890	3.78486	0	0
910	5.12777	0	1.6193
931	4.58172	0	0.20826
953	2.988	0	0
974	3.07628	0	0
995	10.0181	0	0
1016	10.0874	0	0.183407
1037	7.23482	0.267956	0.267956
1057	44.9467	1.09626	2.74065
1076	3.56445	0	1.08483
1091	3.46784	0	0.533514
1109	4.85089	0	0.606361
1129	2.756	0.196857	0.984286
1148	1.64792	0	0.617969
1167	3.12262	0	0.240202
1186	20.7606	0	1.18632
1205	24.2214	1.7301	1.7301
1225	9.6514	0.48257	0
1245	5.95452	0.350266	0
1264	33.8978	1.09348	0
1279	6.95914	0	0
1297	3.63347	0	0.573706
1317	5.58412	0	0.242788
1336	23.7173	1.39514	0
1356	30.1472	0	0.591122
1375	6.13443	0.360849	0
1394	51.664	0.279265	0.55853
1414	15.3407	1.56538	0
1432	28.6933	0.88287	0.441435
1452	22.3824	0	0.43887
1470	14.4331	0.390084	0.585126
1486	24.4651	0.210906	0.210906
1507	15.4788	1.05537	0.351792
1533	24.4455	0.752169	0
1559	22.7326	1.51551	0.252585
1585	15.4811	0	0.494078
1610	24.298	4.1067	0
1663	11.227	0	0.660411
1697	55.6699	0.748922	0.998563
1721	14.4141	4.46152	0
1749	7.47044	1.92786	0.120491
1772	15.5143	0	0
1797	12.7878	0	0
1824	23.605	1.8884	0
1851	25.5805	0.310067	0.155033
1878	40.0397	3.8185	0.2182
1905	27.3002	0.685934	0.411561
1932	8.19728	0.993609	0
1960	62.7846	2.7156	0
1987	31.5721	3.33844	0.190768
2009	14.0309	1.09332	0.364438
2012	3.36582	0	0
2039	33.2686	2.39774	0.299717
2066	8.48209	0.687737	0.229246
2093	30.1437	1.07019	0
2120	44.742	0.70349	0.562792
2145	11.1764	2.57916	0.343888
2171	66.7032	2.6249	0.926434
2195	28.9567	0	0.256254
2220	14.4475	1.35445	0
2243	15.5794	5.23789	0.26861
2263	60.5533	1.24212	0.31053
2286	34.6989	0	0.450635
2308	11.1486	4.18071	0.309682
2331	9.27951	0	0.281197
2353	29.4506	2.04113	0
2377	11.2363	1.60518	0.601944
2400	9.54133	0	0.381653
2423	37.9689	3.79689	0
2447	3.55103	0.221939	0.443879
2470	4.58406	0	0.916812
2494	5.97999	0.597999	0.299
2515	131.714	8.48983	0.242567
2535	54.6813	6.60579	0
2552	67.2636	7.17478	0
2570	49.1262	4.6187	1.25965
2588	5.13991	0	0.395377
2606	131.299	1.41435	0.235725
2624	10.628	1.25035	0
2642	144.062	6.26358	0
2660	5.41792	0	0.361194
2681	9.49682	0	0.412905
2697	10.5856	0.441068	0.441068
2715	27.0492	1.02459	1.43443
2733	145.786	1.58709	0.226728
2751	69.6833	2.69308	0
2769	9.95057	0	0
2787	9.6884	0.908288	0.908288
2806	130.039	5.4183	0.318723
2824	286.99	8.7719	0.331015
2843	25.7031	5.6698	0
2865	14.6543	4.4777	0.407063
2881	100.416	2.9288	1.2552
2900	45.5736	5.12703	0
2918	8.41061	0.885328	0.885328
2937	9.48038	0	0.36463
2955	2.36298	0	0.337568
2974	101.525	2.70734	1.01525
2993	0	0	0
3011	6.13133	1.11479	0
3029	154.778	1.63786	0.409465
3050	137.034	2.82868	0.314298
3068	29.5026	1.43217	0
3085	77.6542	1.48858	0.744289
3104	16.0084	1.65604	0.552012
3122	56.3806	2.11163	0
3141	48.8225	4.67201	0.700801
3159	61.5984	19.2495	0.213883
3177	38.6749	0.831718	0.20793
3196	4.50665	0.265097	0
3213	146.425	4.60456	1.38137
3234	9.19579	1.37937	0
3250	24.6813	1.4308	0.7154
3268	55.6112	7.73204	0
3286	3.775	0.171591	0.171591
3304	53.7796	0.340377	0
3322	38.7869	0.641105	1.92332
3339	51.9014	0.692019	0.346009
3357	98.265	3.97395	0.361268
3375	39.3713	0.762025	0
3392	91.6325	12.1441	0.552003
3411	112.353	12.4836	0
3426	35.4984	0.865814	1.29872
3444	90.665	3.79528	0
3468	9.17596	0.640183	0
3492	56.6879	0.837753	1.117
3516	5.37831	0.158186	0.632742
3540	13.7045	0.409089	0
3564	8.34684	0.758804	0.151761
3589	3.06231	0	0
3614	14.9155	0.62148	1.24296
3636	1.90319	0	0.761275

## Sheet: RoC
RoC Values
	Throughout the core				over the 3.6-0.7 kyrs BP
	Age (yrs BP)	RoC			Age (yrs BP)	RoC
	24	0.377964			729	0.739757
	44	0.33193			749	0.675993
	64	0.377964			769	0.654654
	84	0.385175			789	0.654654
	104	0.466815			809	0.587928
	124	0.438871			829	0.654654
	144	0.434001			849	0.575113
	164	0.559868			869	0.574763
	184	0.597354			889	0.575113
	204	0.653519			909	0.632456
	224	0.515464			929	0.654654
	244	0.568106			949	0.583847
	264	0.560564			969	0.546955
	284	0.57735			989	0.550148
	304	0.52658			1009	0.534522
	324	0.5547			1029	0.600181
	344	0.5304			1049	0.552597
	364	0.546955			1069	0.488467
	384	0.556499			1089	0.477334
	404	0.597354			1109	0.497484
	444	0.540339			1129	0.57735
	464	0.550403			1149	0.556499
	484	0.558155			1169	0.488926
	504	0.597354			1189	0.452964
	524	0.559868			1209	0.444686
	544	0.549167			1229	0.495867
	564	0.569495			1249	0.476206
	584	0.629629			1269	0.43499
	604	0.730889			1289	0.429322
	624	0.707107			1309	0.396476
	644	0.666216			1329	0.45715
	664	0.698672			1349	0.432543
	684	0.710965			1369	0.403769
	704	0.768083			1389	0.388586
	724	0.794732			1409	0.388586
	744	0.780189			1429	0.399339
	764	0.692697			1449	0.385175
	784	0.675993			1469	0.34832
	804	0.642291			1489	0.34832
	824	0.65535			1509	0.343141
	844	0.587779			1529	0.388586
	864	0.59009			1549	0.374682
	884	0.605811			1569	0.338204
	904	0.654654			1589	0.338204
	924	0.601053			1609	0.33193
	944	0.654654			1629	0.353815
	964	0.584418			1649	0.33193
	984	0.575113			1669	0.320364
	1004	0.556825			1689	0.318879
	1024	0.575113			1709	0.285162
	1044	0.595239			1729	0.320364
	1064	0.559868			1749	0.296031
	1084	0.550148			1769	0.27735
	1104	0.556499			1789	0.274871
	1124	0.552597			1809	0.265466
	1144	0.57735			1829	0.296031
	1164	0.550148			1849	0.27735
	1184	0.495867			1869	0.27735
	1204	0.495867			1889	0.27735
	1224	0.485969			1909	0.27735
	1244	0.495867			1929	0.318879
	1264	0.480546			1949	0.277402
	1284	0.459506			1969	0.277402
	1304	0.461677			1989	0.27735
	1324	0.466181			2009	0.27735
	1344	0.459506			2029	0.335191
	1364	0.444686			2049	0.318879
	1384	0.431865			2069	0.303476
	1404	0.434001			2089	0.302989
	1424	0.421947			2109	0.28501
	1444	0.403769			2129	0.338204
	1464	0.388586			2149	0.331716
	1484	0.388586			2169	0.318879
	1504	0.388586			2189	0.318879
	1524	0.387083			2209	0.307963
	1544	0.388586			2229	0.338204
	1564	0.3849			2249	0.333061
	1584	0.375252			2269	0.329659
	1604	0.366757			2289	0.320364
	1624	0.338204			2309	0.320457
	1644	0.341443			2329	0.338204
	1664	0.338204			2349	0.334126
	1684	0.338204			2369	0.331282
	1704	0.324311			2389	0.331887
	1724	0.320364			2409	0.335688
	1744	0.320364			2429	0.378215
	1764	0.318879			2449	0.354845
	1784	0.296031			2469	0.354845
	1804	0.307909			2489	0.348069
	1824	0.280111			2509	0.338204
	1844	0.296031			2529	0.377964
	1864	0.302989			2549	0.346115
	1884	0.280111			2569	0.337667
	1904	0.318879			2589	0.333181
	1924	0.318849			2609	0.337667
	1944	0.305451			2629	0.388586
	1964	0.318127			2649	0.364744
	1984	0.318879			2669	0.338204
	2004	0.320364			2689	0.338204
	2024	0.333333			2709	0.336873
	2044	0.333648			2729	0.350995
	2064	0.338204			2749	0.337956
	2084	0.333333			2769	0.333181
	2104	0.338139			2789	0.333648
	2124	0.337956			2809	0.331168
	2144	0.338204			2829	0.357514
	2164	0.338204			2849	0.337956
	2184	0.338204			2869	0.333199
	2204	0.338204			2889	0.320364
	2224	0.338204			2909	0.320364
	2244	0.338204			2929	0.364377
	2264	0.338204			2949	0.33917
	2284	0.338204			2969	0.349344
	2304	0.338204			2989	0.363671
	2324	0.344223			3009	0.338204
	2344	0.338204			3029	0.378215
	2364	0.33917			3049	0.366757
	2384	0.338204			3069	0.337956
	2404	0.354312			3089	0.332774
	2424	0.374249			3109	0.337956
	2444	0.388586			3129	0.388586
	2464	0.388586			3149	0.385175
	2484	0.388949			3169	0.388586
	2504	0.381647			3189	0.382546
	2524	0.382546			3209	0.388586
	2544	0.388263			3229	0.388586
	2564	0.377964			3249	0.388586
	2584	0.377964			3269	0.388586
	2604	0.381647			3289	0.388586
	2624	0.388586			3309	0.401921
	2644	0.388586			3329	0.432758
	2664	0.385175			3349	0.412331
	2684	0.378215			3369	0.388586
	2704	0.375048			3389	0.388586
	2724	0.357514			3409	0.388586
	2744	0.352887			3429	0.388586
	2764	0.354312			3449	0.403769
	2784	0.354312			3469	0.444686
	2804	0.358607			3489	0.434001
	2824	0.375048			3509	0.459064
	2844	0.369526			3529	0.431624
	2864	0.367697			3549	0.390094
	2884	0.354312			3569	0.421947
	2904	0.338204			3589	0.378215
	2924	0.347222			3609	0.390035
	2944	0.37162			3629	0.403769
	2964	0.388586			3649	0.438871
	2984	0.388586			3669	0.459506
	3004	0.388586			3689	0.438871
	3024	0.378215			3709	0.438871
	3044	0.388586
	3064	0.382959
	3084	0.357514
	3104	0.375048
	3124	0.388586
	3144	0.397159
	3164	0.388586
	3184	0.388586
	3204	0.388586
	3224	0.388586
	3244	0.388586
	3264	0.388586
	3284	0.390094
	3304	0.410259
	3324	0.403769
	3344	0.403769
	3364	0.388586
	3384	0.388586
	3404	0.388586
	3424	0.388586
	3444	0.390094
	3464	0.429047
	3484	0.434001
	3504	0.459064
	3524	0.434001
	3544	0.403587
	3564	0.388586
	3584	0.390094
	3604	0.388586
	3624	0.390065
	3644	0.458831
	3664	0.459506
	3684	0.434001
	3704	0.434001
