# Supplementary material for: Edisto Inlet as a sentinel for the Late Holocene environmental changes over the Ross Sea: insights from foraminifera turnover events
Source: Copernicus journal article supplement (doi:10.5194/egusphere-2025-309), 2025-02-07
Supplement: Supplementary file 1 [file egusphere-2025-309-supplement.zip]

# Supplementary for “Edisto Inlet as a sentinel for the Late Holocene environmental changes over the Ross Sea: insights from foraminifera turnover events”

Giacomo Galli<sup>1,2</sup>, Katrine Elnegaard Hansen<sup>3</sup>, Caterina Morigi<sup>2</sup>, Alessio di Roberto<sup>4</sup>, Federico Giglio<sup>5</sup>, Patrizia Giordano<sup>5</sup> and Karen Gariboldi<sup>2</sup>

<sup>1</sup>Department of Environmental Sciences, Informatics and Statistics, Ca' Foscari University of Venice, Via Torino 155, 30172 Venice, Italy

<sup>2</sup>Department of Earth Sciences, University of Pisa, Via Santa Maria 53, 56126, Pisa, Italy

<sup>3</sup>Department of Geosciences, Arctic Research Center and iClimate Center, Aarhus University, Høegh-Guldbergs Gade 2, 8000 Aarhus C, Aarhus, Denmark

<sup>4</sup>National Institute of Geophysics and Vulcanology (INGV), Section of Pisa, Via Cesare Battisti 53, 56125, Pisa, Italy

<sup>5</sup>National Institute of Polar Sciences (CNR-ISP), Section of Bologna, Via Piero Gobetti 101, 40129, Bologna, Italy

Correspondence to: Giacomo Galli ([giacomo.galli@unive.it](mailto:giacomo.galli@unive.it))

Figure S1. The marine sediments core TR17-08, divided into section, from top (XV) to bottom (I).

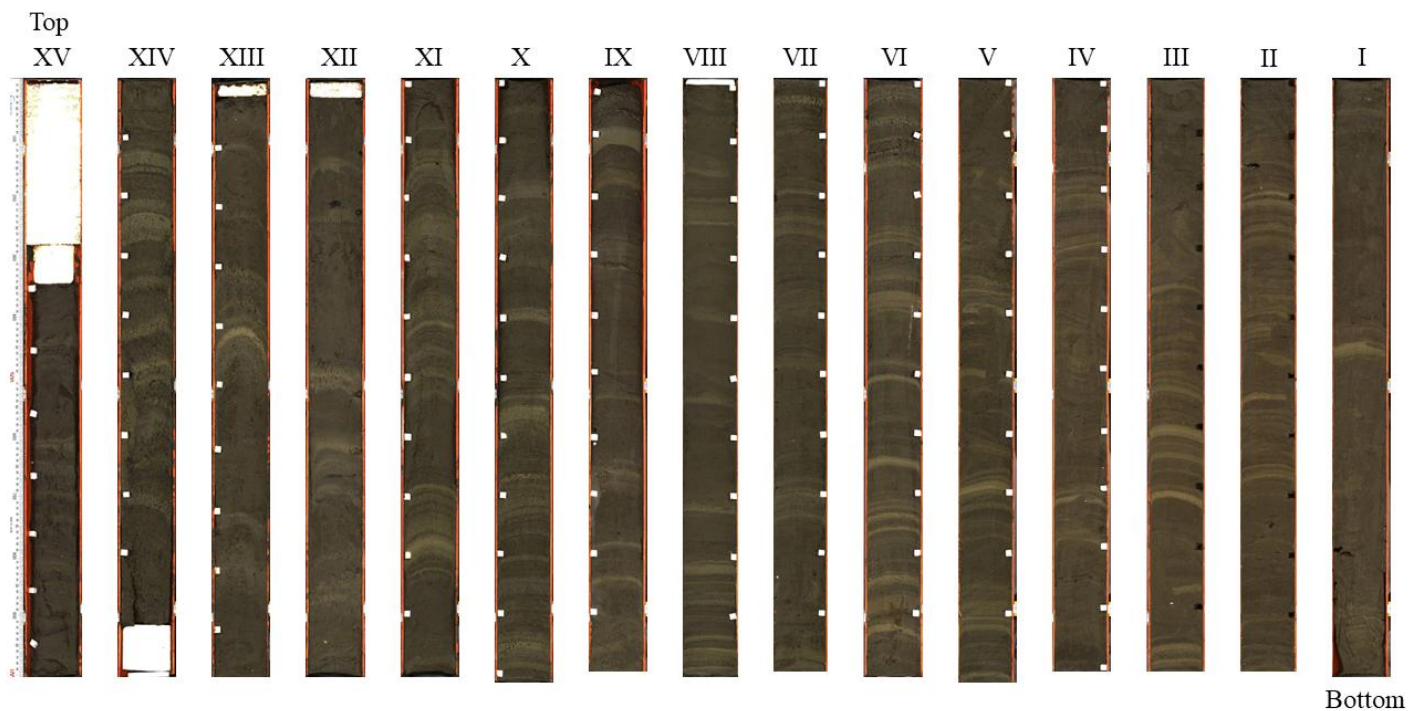

Table S1. Taxonomical list of the foraminifera species found in the TR17-08.

| Test                          | Species                            |                                   |
|-------------------------------|------------------------------------|-----------------------------------|
| <b>Agglutinated</b>           | <i>Labrospira jeffreysii</i>       | <i>Portatrochammina bipolaris</i> |
|                               | <i>Paratrochammina bartrami</i>    | <i>Pseudotrochammina arenacea</i> |
|                               | <i>Paratrochammina tricamerata</i> | <i>Textularia earlandii</i>       |
|                               | <i>Trochammina nana</i>            | <i>Trochammina multiloculata</i>  |
|                               | <i>Portatrochammina antarctica</i> | <i>Rhumberella</i> sp.            |
| <b>Calcareous imperforate</b> | <i>Miliammina arenacea</i>         | <i>Quinqueloculina seminulum</i>  |
|                               | <i>Miliammina oblonga</i>          | <i>Quinqueloculina venusta</i>    |
|                               | <i>Pyrgo depressa</i>              | <i>Quinqueloculina weaveri</i>    |
|                               | <i>Pyrgo williamsoni</i>           | <i>Quinqueloculina</i> spp.       |
| <b>Calcareous perforate</b>   | <i>Ammodiscus</i> sp.              | <i>Lagena</i> sp.                 |
|                               | <i>Astrononion antarcticus</i>     | <i>Melonis barleeaanum</i>        |
|                               | <i>Astrononion echolsi</i>         | <i>Nonionella iridea</i>          |
|                               | <i>Cassidulinoides porrectus</i>   | <i>Nonionella bradii</i>          |
|                               | <i>Cibicides lobatulus</i>         | <i>Nonionella magnalingua</i>     |
|                               | <i>Fissurina semimarginata</i>     | <i>Nonionella</i> sp.             |
|                               | <i>Fissurina</i> spp.              | <i>Oolina hexagona</i>            |
|                               |                                    | <i>Patellina corrugata</i>        |
|                               | <i>Globocassidulina biora</i>      | <i>Procelarogena multilatera</i>  |
|                               | <i>Globocassidulina crassa</i>     | <i>Pullenia quinqueloba</i>       |
|                               | <i>Globocassidulina subglobosa</i> | <i>Rosalina globularis</i>        |
|                               | <i>Globocassidulina</i> spp.       | <i>Rosalina villaderboana</i>     |
|                               | <i>Heronallenia kempii</i>         | <i>Stainforthia feylingi</i>      |
|                               | <i>Hyalinonetrion sahalense</i>    | <i>Stainforthia</i> sp.           |
|                               |                                    | <i>Trifarina angulosa</i>         |
